# Supplementary material for: DFT Mechanistic Study of the Cyclopropanation of Styrene and Aryldiazodiacetate Catalyzed by Tris(pentafluorophenyl)borane
Source: PubMed Central journal article supplement — ACS Omega. 2022 Apr 7;7(15):12900–9. doi: 10.1021/acsomega.2c00200 (PMC9025995; doi:10.1021/acsomega.2c00200), 2022-04-07
Supplement: ao2c00200_si_001.pdf [file ao2c00200_si_001.pdf]

## *Supporting Information*

# DFT Mechanistic Study of the Cyclopropanation of Styrene and Aryldiazodiacetate Catalyzed by Tris(pentafluorophenyl)borane

*Xiuling Wen<sup>[a]#</sup>, Peiquan Lu<sup>[a]#</sup>, Yong Shen<sup>[a]</sup>, Haojie Peng<sup>[a]</sup>, Zhuofeng Ke<sup>[b]</sup>, and Cunyuan Zhao<sup>\*[a]</sup>*

[a] MOE Key Laboratory of Bioinorganic and Synthetic Chemistry, School of Chemistry, Sun Yat-sen University, Guangzhou 510275, P. R. China;

[b] MOE Key Laboratory of Bioinorganic and Synthetic Chemistry, School of Chemistry, School of Materials Science and Engineering, Sun Yat-sen University, Guangzhou 510275, P. R. China;

\*E-mail: [ceszhcy@mail.sysu.edu.cn](mailto:ceszhcy@mail.sysu.edu.cn)

## **Contents**

**SI1:** Other Possible Pathways in Mechanism A of Activating N-bound boron.

**SI2:** Other Possible Pathways in Mechanism C of Activating O-bound boron.

**SI3:** Table of Energy Values.

**SI4:** Calculated Imaginary Frequencies of all Transition States Species.

**SI5:** Cartesian Coordinates.

### SI1 Other Possible Pathways in Mechanism A of Activating N-bound boron.

We also calculated and considered another pathway of aryldiazodiacetate substrate **N-bound boron** activation mechanism: the mechanism by which styrene nucleophilic attack directly forms ternary rings, as shown in **Figure S1**. The free energy of transition state is 34.8 kcal/mol, so it is excluded by us.

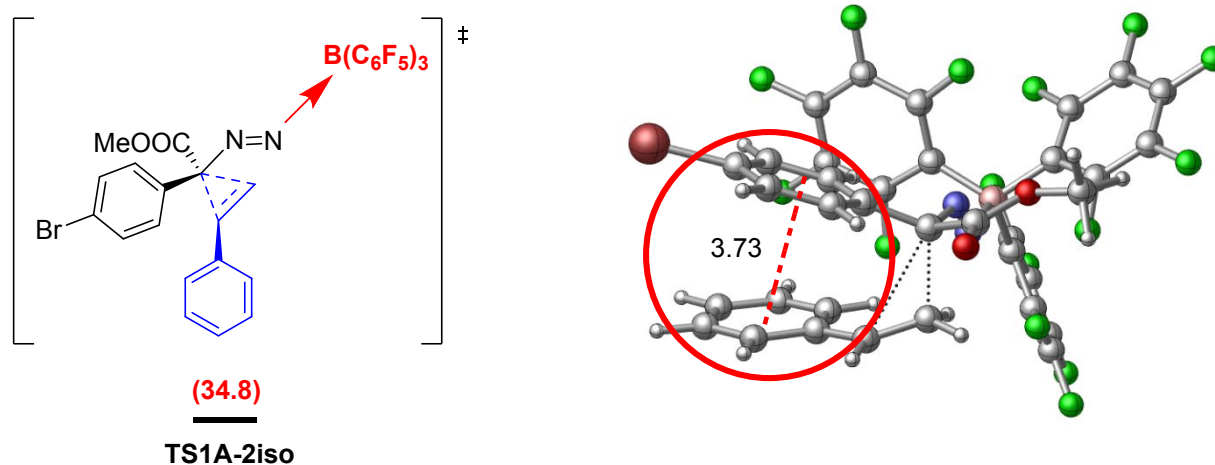

**Figure S1.** Other Possible Pathways in Mechanism A of Activating N-bound boron. Free energies are relative to **1a**, and are given in kcal/mol.

### SI2 Other Possible Pathways in Mechanism C of Activating O-bound boron.

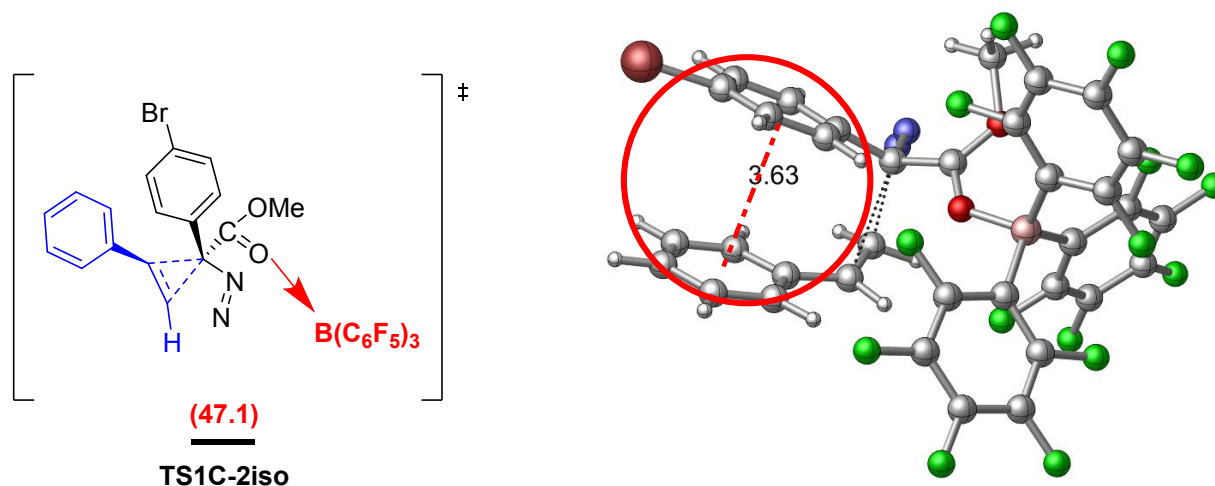

**Figure S2.** Other Possible Pathways in Mechanism C of Activating O-bound boron. Free energies are relative to **1a**, and are given in kcal/mol.

In the same way, we also calculated and considered another pathway of aryldiazodiacetate substrate O-bound boron activation mechanism: the mechanism by which styrene nucleophilic attack directly forms ternary rings, as shown in **Figure S2**. The transition state has a high free energy of 47.1 kcal/mol, so it is also excluded by us.

### SI3 Table of energy values.

**Table S1.** Energies (in hartree) for the related TSs and intermediates by B3LYP-D3 method

| Species                                              | G         | E <sub>0</sub> | E            | H <sub>433</sub> | G <sub>433</sub> | E <sub>(B3LYP-D3)</sub> |
|------------------------------------------------------|-----------|----------------|--------------|------------------|------------------|-------------------------|
| <b>1a</b>                                            | 0.107175  | -3178.354328   | -3178.341273 | -3178.340329     | -3178.396002     | -3181.421806            |
| <b>2a</b>                                            | 0.103009  | -309.526929    | -309.520265  | -309.519321      | -309.557834      | -309.7467101            |
| <b>3a</b>                                            | 0.228184  | -3378.445973   | -3378.428034 | -3378.427090     | -3378.495414     | -3381.68512             |
| <b>3a-iso</b>                                        | 0.227868  | -3378.444201   | -3378.426173 | -3378.425229     | -3378.493746     | -3381.6823025           |
| <b>Cat-B(C<sub>6</sub>F<sub>5</sub>)<sub>3</sub></b> | 0.092584  | -2208.097896   | -2208.069025 | -2208.068081     | -2208.159098     | -2208.9826472           |
| <b>N<sub>2</sub></b>                                 | -0.012840 | -109.509597    | -109.507237  | -109.506293      | -109.528046      | -109.5600205            |
| <b>IN1A</b>                                          | 0.226123  | -5386.468058   | -5386.425232 | -5386.424288     | -5386.546905     | -5390.4128401           |
| <b>TS1A</b>                                          | 0.356885  | -5695.981161   | -5695.931595 | -5695.930651     | -5696.066333     | -5700.1606793           |

|                           |          |              |              |              |              |               |
|---------------------------|----------|--------------|--------------|--------------|--------------|---------------|
| <b>IN2A</b>               | 0.362063 | -5696.065205 | -5696.016618 | -5696.015674 | -5696.150143 | -5700.2250027 |
| <b>TS2A</b>               | 0.349035 | -5695.973394 | -5695.923138 | -5695.922194 | -5696.061200 | -5700.1320209 |
| <b>TS1A-N<sub>2</sub></b> | 0.219521 | -5386.428270 | -5386.384348 | -5386.383404 | -5386.509142 | -5390.3717692 |
| <b>IN1D</b>               | 0.097445 | -3068.800092 | -3068.788671 | -3068.787727 | -3068.839843 | -3071.8256494 |
| <b>TS2D</b>               | 0.221323 | -3378.336924 | -3378.317757 | -3378.316813 | -3378.387467 | -3381.5796099 |
| <b>TS1B-N<sub>2</sub></b> | 0.220153 | -5386.429695 | -5386.385717 | -5386.384772 | -5386.509731 | -5390.3727654 |
| <b>IN1B</b>               | 0.221380 | -5276.963114 | -5276.922596 | -5276.921651 | -5277.036566 | -5280.8648826 |
| <b>TS2B</b>               | 0.350747 | -5586.495364 | -5586.448033 | -5586.447089 | -5586.576424 | -5590.6122215 |
| <b>TS1C</b>               | 0.354905 | -5695.989373 | -5695.939858 | -5695.938914 | -5696.075478 | -5700.1497778 |
| <b>IN2C</b>               | 0.358817 | -5696.041784 | -5695.992828 | -5695.991884 | -5696.127991 | -5700.2029242 |
| <b>TS2C</b>               | 0.351207 | -5696.009540 | -5695.959462 | -5695.958518 | -5696.096373 | -5700.1720611 |
| <b>E-IN1C</b>             | 0.225508 | -5386.475440 | -5386.432576 | -5386.431632 | -5386.554713 | -5390.4241545 |
| <b>E-TS3C</b>             | 0.219828 | -5386.436565 | -5386.393073 | -5386.392129 | -5386.517686 | -5390.3854542 |
| <b>E-IN3C</b>             | 0.215645 | -5276.937119 | -5276.895897 | -5276.894953 | -5277.014963 | -5280.8407326 |
| <b>E-TS4C</b>             | 0.341413 | -5586.479339 | -5586.430602 | -5586.429658 | -5586.566917 | -5590.5989956 |
| <b>Z-IN1C</b>             | 0.227466 | -5386.484765 | -5386.442013 | -5386.441069 | -5386.562165 | -5390.4317374 |
| <b>Z-TS3C</b>             | 0.220591 | -5386.443503 | -5386.400081 | -5386.399137 | -5386.523839 | -5390.3900389 |
| <b>Z-IN3C</b>             | 0.217450 | -5276.947960 | -5276.906967 | -5276.906023 | -5277.024515 | -5280.8488882 |
| <b>Z-TS4C</b>             | 0.343976 | -5586.488999 | -5586.440638 | -5586.439694 | -5586.574410 | -5590.608066  |
| <b>TS5C</b>               | 0.344003 | -5586.485269 | -5586.436858 | -5586.435914 | -5586.570742 | -5590.6018467 |
| <b>TS1A-2iso</b>          | 0.352797 | -5695.987078 | -5695.937165 | -5695.936221 | -5696.074586 | -5700.1457944 |
| <b>TS1C-2iso</b>          | 0.353654 | -5695.966837 | -5695.916922 | -5695.915978 | -5696.052601 | -5700.1269347 |
| <b>TS1D-N<sub>2</sub></b> | 0.101362 | -3178.302148 | -3178.288413 | -3178.287468 | -3178.345261 | -3181.3709229 |
| <b>TS1E</b>               | 0.232558 | -3487.862956 | -3487.842984 | -3487.842039 | -3487.914436 | -3491.1450655 |
| <b>TS1F</b>               | 0.231806 | -3487.839815 | -3487.819585 | -3487.818641 | -3487.891082 | -3491.1236934 |
| <b>Re1</b>                | 0.071726 | -415.843207  | -415.834819  | -415.833875  | -415.876888  | -416.0858823  |
| <b>IN1G</b>               | 0.192404 | -2623.977679 | -2623.939955 | -2623.939011 | -2624.047998 | -2625.0986094 |
| <b>TS1G-N<sub>2</sub></b> | 0.184360 | -2623.913257 | -2623.874594 | -2623.873650 | -2623.986342 | -2625.0344411 |
| <b>Re2</b>                | 0.068002 | -508.080514  | -508.070402  | -508.069458  | -508.116971  | -508.3498452  |
| <b>IN1J</b>               | 0.186970 | -2716.203241 | -2716.163441 | -2716.162497 | -2716.276889 | -2717.3512076 |
| <b>TS1J-N<sub>2</sub></b> | 0.181547 | -2716.154300 | -2716.113813 | -2716.112868 | -2716.229095 | -2717.2993322 |

|                           |          |              |              |              |              |               |
|---------------------------|----------|--------------|--------------|--------------|--------------|---------------|
| <b>Re3</b>                | 0.081206 | -604.387831  | -604.376079  | -604.375135  | -604.426602  | -604.7076985  |
| <b>IN1H</b>               | 0.200137 | -2812.504086 | -2812.462825 | -2812.461881 | -2812.580461 | -2813.7025008 |
| <b>TS1H-N<sub>2</sub></b> | 0.193414 | -2812.444790 | -2812.402370 | -2812.401426 | -2812.523032 | -2813.6430887 |

G=Thermal correction to Gibbs Free Energy by B3LYP-D3 at the solvent phase.

E<sub>0</sub>= Sum of electronic and zero-point Energies by B3LYP-D3 at the solvent phase.

E= Sum of electronic and thermal Energies by B3LYP-D3 at the solvent phase.

H<sub>433</sub>= Sum of electronic and thermal Enthalpies by B3LYP-D3 at the solvent phase.

G<sub>433</sub>= Sum of electronic and thermal Free Energies by B3LYP-D3 at the solvent phase.

E<sub>(B3LYP-D3)</sub>= Single point energies calculated by B3LYP-D3 in the 1,2-Dichloroethane solvent.

**SI4 Calculated imaginary frequencies of all transition states species.**

| <b>Species</b>      | <b>IF</b> |
|---------------------|-----------|
| TS1A                | -238.86   |
| TS2A                | -737.55   |
| TS1A-N <sub>2</sub> | -317.95   |
| TS2D                | -36.45    |
| TS1B-N <sub>2</sub> | -293.98   |
| TS2B                | -217.61   |
| TS1C                | -401.87   |
| TS2C                | -265.84   |
| <i>E</i> -TS3C      | -358.96   |
| <i>E</i> -TS4C      | -71.58    |
| <i>Z</i> -TS3C      | -369.78   |
| <i>Z</i> -TS4C      | -47.28    |
| TS5C                | -138.73   |
| TS1A-2iso           | -423.50   |
| TS1C-2iso           | -500.16   |
| TS1D-N <sub>2</sub> | -318.65   |
| TS1E                | -436.48   |
| TS1F                | -449.76   |

|                     |         |
|---------------------|---------|
| TS1G-N <sub>2</sub> | -293.79 |
| TS1J-N <sub>2</sub> | -299.45 |
| TS1H-N <sub>2</sub> | -127.97 |

### SI5 Cartesian coordinates

21

1a SCF Done: E(RB3LYP) = -3178.50317690

|   |          |          |          |
|---|----------|----------|----------|
| C | -2.78305 | 1.24011  | 0.00001  |
| C | -1.39694 | 1.09864  | 0.00076  |
| C | -0.56203 | 2.231    | 0.00038  |
| C | -1.16363 | 3.50395  | -0.00076 |
| C | -2.54716 | 3.64779  | -0.00151 |
| C | -3.3536  | 2.51079  | -0.00113 |
| H | -3.41577 | 0.35981  | 0.00031  |
| H | -0.95829 | 0.11035  | 0.00163  |
| H | -0.55492 | 4.4032   | -0.0011  |
| H | -2.99368 | 4.63546  | -0.0024  |
| C | 0.90786  | 2.09673  | 0.00113  |
| N | 1.6286   | 3.20049  | 0.00088  |
| N | 2.22632  | 4.16835  | 0.00093  |
| C | 1.68094  | 0.84529  | 0.00177  |
| O | 1.20559  | -0.27457 | 0.00184  |

|    |          |          |          |
|----|----------|----------|----------|
| O  | 3.01439  | 1.09063  | 0.00235  |
| C  | 3.84803  | -0.08103 | 0.00302  |
| H  | 3.6587   | -0.68833 | -0.88591 |
| H  | 4.87232  | 0.29105  | 0.00341  |
| H  | 3.65787  | -0.6879  | 0.89207  |
| Br | -5.25482 | 2.70007  | -0.0022  |

16

**2a** SCF Done: E(RB3LYP) = -309.66084258

|   |          |         |          |
|---|----------|---------|----------|
| C | -1.66068 | 2.0746  | 0.76429  |
| C | -0.32802 | 2.17607 | 0.36132  |
| C | 0.36682  | 3.39731 | 0.44122  |
| C | -0.32294 | 4.52016 | 0.94159  |
| C | -1.65291 | 4.4198  | 1.34396  |
| C | -2.32968 | 3.19698 | 1.25785  |
| H | -2.17475 | 1.11953 | 0.69239  |
| H | 0.18715  | 1.29793 | -0.02217 |
| H | 0.18271  | 5.47883 | 1.01713  |
| H | -2.16571 | 5.29855 | 1.72686  |
| H | -3.36723 | 3.12275 | 1.57279  |
| C | 1.7725   | 3.44344 | 0.00105  |



|   |         |         |          |
|---|---------|---------|----------|
| H | 2.16322 | 2.49166 | -0.36042 |
| C | 2.59232 | 4.50408 | 0.00057  |
| H | 2.25336 | 5.51486 | -0.21382 |
| H | 3.65037 | 4.38807 | 0.21975  |

35

**3a** SCF Done: E(RB3LYP) = -3378.72359767

|   |          |          |          |
|---|----------|----------|----------|
| C | -2.90357 | 1.79899  | -0.30929 |
| C | -1.53089 | 1.77375  | -0.53872 |
| C | -0.63923 | 2.39215  | 0.3469   |
| C | -1.15166 | 3.0268   | 1.48182  |
| C | -2.52518 | 3.06386  | 1.72875  |
| C | -3.38915 | 2.4509   | 0.82471  |
| H | -3.58991 | 1.32611  | -1.00215 |
| H | -1.14335 | 1.27699  | -1.42172 |
| H | -0.47326 | 3.49888  | 2.1865   |
| H | -2.91693 | 3.55936  | 2.60972  |
| C | 0.83407  | 2.36508  | 0.06965  |
| C | 1.46153  | 1.01038  | 0.22142  |
| O | 0.84835  | -0.02666 | 0.363    |
| O | 2.81598  | 1.06157  | 0.14863  |

|    |          |          |          |
|----|----------|----------|----------|
| C  | 3.47676  | -0.21193 | 0.22964  |
| H  | 3.15281  | -0.86673 | -0.5839  |
| H  | 4.54243  | 0.00318  | 0.14898  |
| H  | 3.25315  | -0.70141 | 1.18115  |
| C  | 1.67621  | 3.59934  | 0.31786  |
| C  | 1.4084   | 3.221    | -1.10553 |
| H  | 2.68075  | 3.45301  | 0.69734  |
| H  | 1.1581   | 4.46457  | 0.71825  |
| H  | 2.23946  | 2.73306  | -1.60632 |
| C  | 0.51286  | 3.97029  | -2.03102 |
| C  | -0.44333 | 4.90177  | -1.59764 |
| C  | 0.6153   | 3.71526  | -3.40725 |
| C  | -1.27054 | 5.55191  | -2.51222 |
| H  | -0.55966 | 5.111    | -0.53985 |
| C  | -0.20829 | 4.36786  | -4.32419 |
| H  | 1.35037  | 2.99628  | -3.76091 |
| C  | -1.1573  | 5.28951  | -3.87912 |
| H  | -2.00759 | 6.26482  | -2.15391 |
| H  | -0.10819 | 4.15544  | -5.38485 |
| H  | -1.80237 | 5.79836  | -4.58937 |
| Br | -5.27557 | 2.50768  | 1.14061  |

**3a-iso** SCF Done: E(RB3LYP) = -3378.72161421

|   |          |          |          |
|---|----------|----------|----------|
| C | -2.93874 | 2.46073  | -0.47217 |
| C | -1.57749 | 2.35925  | -0.76516 |
| C | -0.61818 | 2.33109  | 0.25207  |
| C | -1.0512  | 2.39188  | 1.58434  |
| C | -2.40503 | 2.49095  | 1.89531  |
| C | -3.33937 | 2.52819  | 0.85962  |
| H | -3.6757  | 2.48331  | -1.26679 |
| H | -1.26395 | 2.29428  | -1.80271 |
| H | -0.3189  | 2.34324  | 2.38247  |
| H | -2.73377 | 2.53852  | 2.92715  |
| C | 0.84598  | 2.22508  | -0.06506 |
| C | 1.50935  | 0.97002  | 0.43552  |
| O | 1.14687  | 0.35399  | 1.41678  |
| O | 2.60574  | 0.64529  | -0.28021 |
| C | 3.43708  | -0.37285 | 0.30303  |
| H | 2.87554  | -1.30012 | 0.43876  |
| H | 4.26002  | -0.51583 | -0.39696 |
| H | 3.81394  | -0.0352  | 1.27235  |

|    |          |         |          |
|----|----------|---------|----------|
| C  | 1.72108  | 3.49263 | 0.09749  |
| C  | 1.42157  | 2.9474  | -1.2659  |
| H  | 1.13365  | 4.35759 | 0.40131  |
| H  | 2.21926  | 2.4472  | -1.80199 |
| Br | -5.20115 | 2.67324 | 1.27699  |
| H  | 0.72575  | 3.49955 | -1.88879 |
| C  | 3.08214  | 3.41536 | 0.719    |
| C  | 4.24507  | 3.56861 | -0.0438  |
| C  | 3.20337  | 3.18292 | 2.09674  |
| C  | 5.50403  | 3.48828 | 0.55377  |
| H  | 4.16069  | 3.746   | -1.11186 |
| C  | 4.45997  | 3.09889 | 2.69634  |
| H  | 2.30604  | 3.04927 | 2.69488  |
| C  | 5.61529  | 3.25099 | 1.92508  |
| H  | 6.39757  | 3.60823 | -0.05242 |
| H  | 4.53747  | 2.91147 | 3.76354  |
| H  | 6.59457  | 3.18416 | 2.39024  |

34

Cat-B(C<sub>6</sub>F<sub>5</sub>)<sub>3</sub> SCF Done: E(RB3LYP) = -2208.25168232

|   |          |         |         |
|---|----------|---------|---------|
| B | -0.51919 | 1.19836 | 0.00026 |
|---|----------|---------|---------|

|   |          |          |          |
|---|----------|----------|----------|
| C | -1.28851 | 2.56234  | -0.01632 |
| C | -2.50655 | 2.74407  | 0.6576   |
| C | -0.80665 | 3.68613  | -0.70608 |
| C | -3.19946 | 3.94921  | 0.66118  |
| C | -1.48077 | 4.90146  | -0.74058 |
| C | -2.68315 | 5.03297  | -0.04755 |
| C | 1.04661  | 1.18291  | 0.00311  |
| C | 1.78724  | 0.20182  | -0.67423 |
| C | 1.8038   | 2.14929  | 0.68333  |
| C | 3.17709  | 0.17741  | -0.69074 |
| C | 3.19377  | 2.14685  | 0.7046   |
| C | 3.8832   | 1.15539  | 0.00809  |
| C | -1.31507 | -0.15032 | 0.01371  |
| C | -0.85842 | -1.28276 | 0.7064   |
| C | -2.533   | -0.30891 | -0.66611 |
| C | -1.556   | -2.48488 | 0.73816  |
| C | -3.249   | -1.50045 | -0.67255 |
| C | -2.75725 | -2.59361 | 0.03925  |
| F | -1.08889 | -3.53151 | 1.42602  |
| F | 0.28851  | -1.23402 | 1.40336  |
| F | -3.43398 | -3.74033 | 0.05164  |

|   |          |          |          |
|---|----------|----------|----------|
| F | -4.39756 | -1.60755 | -1.34791 |
| F | -3.05022 | 0.70829  | -1.37413 |
| F | 0.3426   | 3.61569  | -1.39731 |
| F | -3.04673 | 1.73685  | 1.36273  |
| F | -4.34891 | 4.07835  | 1.33113  |
| F | -3.33743 | 6.19259  | -0.0625  |
| F | -0.99036 | 5.9393   | -1.42553 |
| F | 3.87169  | 3.08002  | 1.3802   |
| F | 1.19222  | 3.12253  | 1.37794  |
| F | 5.21476  | 1.14256  | 0.0103   |
| F | 1.15928  | -0.75949 | -1.37081 |
| F | 3.83913  | -0.76873 | -1.36407 |

2

**N<sub>2</sub>** SCF Done: E(RB3LYP) = -109.51520581

|   |          |        |    |
|---|----------|--------|----|
| N | -1.26146 | 1.8599 | 0. |
|---|----------|--------|----|

|   |          |        |    |
|---|----------|--------|----|
| N | -2.36677 | 1.8599 | 0. |
|---|----------|--------|----|

55

**IN1A** SCF Done: E(RB3LYP) = -5386.77302755

|   |         |          |          |
|---|---------|----------|----------|
| C | -2.4826 | -1.08792 | -1.38224 |
|---|---------|----------|----------|

|   |          |          |          |
|---|----------|----------|----------|
| N | -1.30437 | -0.59015 | -1.53743 |
| N | -0.21813 | -0.19196 | -1.61338 |
| C | -3.65849 | -0.2033  | -1.44403 |
| C | -4.95362 | -0.69232 | -1.20711 |
| C | -3.48102 | 1.16585  | -1.72345 |
| C | -6.04573 | 0.17181  | -1.24644 |
| H | -5.10654 | -1.73988 | -0.9877  |
| C | -4.56906 | 2.02669  | -1.7622  |
| H | -2.49332 | 1.56923  | -1.9178  |
| C | -5.85009 | 1.52393  | -1.52103 |
| H | -7.04393 | -0.20741 | -1.0608  |
| H | -4.42522 | 3.0793   | -1.97632 |
| C | -2.48023 | -2.55642 | -1.04194 |
| O | -3.47279 | -3.2077  | -0.80725 |
| O | -1.22497 | -3.01237 | -1.00215 |
| C | -1.03483 | -4.38061 | -0.58671 |
| H | 0.0457   | -4.50838 | -0.55032 |
| H | -1.47888 | -4.53926 | 0.39853  |
| H | -1.48986 | -5.0618  | -1.30913 |
| B | 0.78447  | 0.20073  | -0.19058 |
| C | 2.24483  | -0.21805 | -0.73154 |

|   |          |          |          |
|---|----------|----------|----------|
| C | 2.43889  | -1.43192 | -1.39814 |
| C | 3.66162  | -1.85637 | -1.89962 |
| C | 4.77884  | -1.03961 | -1.73464 |
| C | 4.64409  | 0.17496  | -1.07147 |
| C | 3.39375  | 0.56395  | -0.58689 |
| C | 0.09437  | -0.72009 | 0.95198  |
| C | -1.1995  | -0.42168 | 1.40068  |
| C | -1.92804 | -1.22156 | 2.27687  |
| C | -1.34821 | -2.38982 | 2.76203  |
| C | -0.05692 | -2.72362 | 2.36406  |
| C | 0.63771  | -1.89319 | 1.48614  |
| C | 0.54943  | 1.78327  | 0.05023  |
| C | 0.86821  | 2.31649  | 1.30171  |
| C | 0.67471  | 3.65204  | 1.63623  |
| C | 0.13347  | 4.52096  | 0.69003  |
| C | -0.19563 | 4.0362   | -0.57124 |
| C | 0.03191  | 2.69342  | -0.86513 |
| F | 1.39109  | -2.27216 | -1.56327 |
| F | 3.77754  | -3.03368 | -2.52819 |
| F | 5.96753  | -1.42371 | -2.20656 |
| F | 5.71185  | 0.96436  | -0.90277 |



|    |          |          |          |
|----|----------|----------|----------|
| F  | 3.35701  | 1.74991  | 0.04719  |
| F  | -1.83892 | 0.67688  | 0.93565  |
| F  | -3.17157 | -0.88603 | 2.6373   |
| F  | -2.02557 | -3.18878 | 3.58963  |
| F  | 0.50275  | -3.8549  | 2.81323  |
| F  | 1.87614  | -2.30288 | 1.16255  |
| F  | -0.32362 | 2.28996  | -2.11372 |
| F  | -0.72608 | 4.85393  | -1.4905  |
| F  | -0.06755 | 5.80642  | 0.99275  |
| F  | 1.00172  | 4.1089   | 2.85052  |
| F  | 1.4045   | 1.51767  | 2.24412  |
| Br | -7.34472 | 2.7026   | -1.56936 |

71

**TS1A** SCF Done: E(RB3LYP) = -5696.42321845

|   |          |          |          |
|---|----------|----------|----------|
| N | -0.21777 | 1.28639  | 0.6125   |
| N | 0.53257  | 0.36794  | 0.74763  |
| B | 1.66674  | -0.11722 | -0.2939  |
| C | 2.40022  | 1.08897  | -1.11174 |
| C | 2.56223  | 2.39977  | -0.66583 |
| C | 3.29455  | 3.36026  | -1.36281 |

|   |          |          |          |
|---|----------|----------|----------|
| C | 3.91767  | 3.01899  | -2.55558 |
| C | 3.79951  | 1.71752  | -3.03319 |
| C | 3.05847  | 0.79222  | -2.30848 |
| C | 0.67037  | -1.06325 | -1.19902 |
| C | 0.28394  | -2.34795 | -0.81299 |
| C | -0.69334 | -3.09299 | -1.4642  |
| C | -1.34245 | -2.554   | -2.56726 |
| C | -0.99265 | -1.2803  | -3.00005 |
| C | -0.0184  | -0.56288 | -2.31039 |
| C | 2.83607  | -0.87245 | 0.54933  |
| C | 3.51876  | -2.00053 | 0.09317  |
| C | 4.59376  | -2.56688 | 0.7733   |
| C | 5.03824  | -1.991   | 1.9584   |
| C | 4.4029   | -0.85258 | 2.44214  |
| C | 3.3382   | -0.31591 | 1.72605  |
| F | 2.01026  | 2.81103  | 0.49425  |
| F | 3.40654  | 4.61023  | -0.883   |
| F | 4.62848  | 3.92846  | -3.23639 |
| F | 4.40018  | 1.36949  | -4.18291 |
| F | 2.98949  | -0.45768 | -2.81895 |
| F | 0.81007  | -2.9227  | 0.29399  |

|   |          |          |          |
|---|----------|----------|----------|
| F | -1.06255 | -4.29473 | -0.99154 |
| F | -2.30536 | -3.2424  | -3.18961 |
| F | -1.6258  | -0.73551 | -4.04956 |
| F | 0.19777  | 0.6944   | -2.74756 |
| F | 2.7815   | 0.81447  | 2.22603  |
| F | 4.8259   | -0.27809 | 3.5796   |
| F | 6.06999  | -2.52521 | 2.62523  |
| F | 5.20524  | -3.66194 | 0.29448  |
| F | 3.15349  | -2.60659 | -1.05488 |
| C | -1.26205 | 1.75285  | 1.34223  |
| C | -2.58058 | 1.71344  | 0.71782  |
| C | -3.67231 | 2.47109  | 1.18388  |
| C | -2.79632 | 0.80008  | -0.33781 |
| C | -4.93446 | 2.31749  | 0.61562  |
| H | -3.53862 | 3.16887  | 1.99862  |
| C | -4.05081 | 0.64151  | -0.90774 |
| H | -1.9812  | 0.19311  | -0.71299 |
| C | -5.11618 | 1.40188  | -0.41999 |
| H | -5.76758 | 2.90436  | 0.98584  |
| H | -4.19611 | -0.06843 | -1.71415 |
| C | -0.87155 | 2.66244  | 2.47033  |

|    |          |          |          |
|----|----------|----------|----------|
| O  | -1.65472 | 3.31928  | 3.1306   |
| O  | 0.44247  | 2.5956   | 2.69482  |
| C  | 0.96286  | 3.39727  | 3.77458  |
| H  | 2.03631  | 3.21014  | 3.77031  |
| H  | 0.75415  | 4.45528  | 3.59509  |
| H  | 0.521    | 3.08711  | 4.72532  |
| Br | -6.8535  | 1.17615  | -1.18312 |
| C  | -1.2712  | -0.27317 | 2.84811  |
| C  | 0.05504  | -0.60859 | 2.59981  |
| H  | 0.83507  | -0.09097 | 3.14424  |
| H  | 0.33364  | -1.56293 | 2.17105  |
| H  | -1.47485 | 0.46415  | 3.61929  |
| C  | -2.42922 | -1.00633 | 2.34528  |
| C  | -3.72515 | -0.5704  | 2.68997  |
| C  | -2.30913 | -2.10196 | 1.46587  |
| C  | -4.8537  | -1.19013 | 2.15784  |
| H  | -3.83786 | 0.27445  | 3.36406  |
| C  | -3.43647 | -2.72217 | 0.93506  |
| H  | -1.3302  | -2.48182 | 1.20649  |
| C  | -4.71475 | -2.26257 | 1.27062  |
| H  | -5.84301 | -0.82877 | 2.42394  |

H -3.31099 -3.55782 0.25193

H -5.59515 -2.73798 0.84725

71

**IN2A** SCF Done: E(RB3LYP) = -5696.51220592

N -0.23708 1.15027 0.68377

N 0.39841 0.11393 0.92508

B 1.58791 -0.42489 -0.0636

C 2.12869 0.75175 -1.06022

C 2.50172 2.00725 -0.5738

C 3.06335 3.00905 -1.35939

C 3.30967 2.76285 -2.70476

C 2.99503 1.51634 -3.23055

C 2.43079 0.54316 -2.4094

C 0.74096 -1.6249 -0.80627

C 0.75909 -2.96797 -0.42389

C -0.09079 -3.93362 -0.96184

C -1.03307 -3.56359 -1.91356

C -1.10042 -2.2367 -2.32349

C -0.22011 -1.31372 -1.7741

C 2.89222 -0.89242 0.80239

|   |          |          |          |
|---|----------|----------|----------|
| C | 3.83223  | -1.72976 | 0.19339  |
| C | 5.03513  | -2.10008 | 0.78103  |
| C | 5.35643  | -1.60985 | 2.04353  |
| C | 4.47099  | -0.75063 | 2.6796   |
| C | 3.28062  | -0.39713 | 2.04636  |
| F | 2.34786  | 2.29463  | 0.73499  |
| F | 3.38508  | 4.19892  | -0.82525 |
| F | 3.8548   | 3.70899  | -3.48084 |
| F | 3.24307  | 1.25555  | -4.52461 |
| F | 2.18988  | -0.64477 | -3.00393 |
| F | 1.58091  | -3.39598 | 0.55793  |
| F | -0.03312 | -5.20453 | -0.53836 |
| F | -1.90542 | -4.46021 | -2.38944 |
| F | -2.03714 | -1.85309 | -3.20275 |
| F | -0.37544 | -0.03458 | -2.18453 |
| F | 2.49812  | 0.47518  | 2.72673  |
| F | 4.76757  | -0.25771 | 3.89287  |
| F | 6.50738  | -1.95819 | 2.63315  |
| F | 5.88886  | -2.91684 | 0.14446  |
| F | 3.58679  | -2.21647 | -1.04249 |
| C | -1.35226 | 1.33531  | 1.64613  |

|    |          |          |          |
|----|----------|----------|----------|
| C  | -2.60776 | 1.77314  | 0.90967  |
| C  | -3.65901 | 2.43339  | 1.55704  |
| C  | -2.80987 | 1.29707  | -0.39498 |
| C  | -4.9067  | 2.55521  | 0.94312  |
| H  | -3.53153 | 2.81167  | 2.56123  |
| C  | -4.05054 | 1.40764  | -1.01681 |
| H  | -2.01248 | 0.79544  | -0.92832 |
| C  | -5.10097 | 2.00536  | -0.32246 |
| H  | -5.72389 | 3.03425  | 1.47017  |
| H  | -4.1982  | 0.9976   | -2.00843 |
| C  | -0.85487 | 2.30487  | 2.74833  |
| O  | -1.57138 | 2.80818  | 3.58578  |
| O  | 0.46865  | 2.41598  | 2.70904  |
| C  | 1.11255  | 3.19089  | 3.74565  |
| H  | 2.17165  | 3.11779  | 3.53484  |
| H  | 0.78315  | 4.22466  | 3.69909  |
| H  | 0.88795  | 2.77382  | 4.72467  |
| Br | -6.85278 | 2.00482  | -1.09554 |
| C  | -1.49936 | -0.10909 | 2.35979  |
| C  | -0.10294 | -0.67785 | 2.0934   |
| H  | 0.58065  | -0.46392 | 2.91174  |

|   |          |          |          |
|---|----------|----------|----------|
| H | -0.05676 | -1.74077 | 1.86427  |
| H | -1.63613 | 0.06551  | 3.43162  |
| C | -2.67999 | -0.91672 | 1.85627  |
| C | -3.94291 | -0.68805 | 2.42572  |
| C | -2.58446 | -1.80954 | 0.7841   |
| C | -5.08103 | -1.31017 | 1.91196  |
| H | -4.03165 | 0.00169  | 3.26118  |
| C | -3.71897 | -2.44218 | 0.26999  |
| H | -1.62401 | -2.01425 | 0.33652  |
| C | -4.97578 | -2.18666 | 0.82702  |
| H | -6.04248 | -1.10415 | 2.35222  |
| H | -3.61288 | -3.12197 | -0.57046 |
| H | -5.8607  | -2.6688  | 0.42749  |

71

**TS2A** SCF Done: E(RB3LYP) = -5696.41023532

|   |          |          |          |
|---|----------|----------|----------|
| N | 0.60936  | 0.8392   | 0.30383  |
| N | -0.30888 | 0.35728  | -0.16315 |
| B | -1.86424 | -0.15812 | 0.3798   |
| C | -2.45801 | 1.0157   | 1.32756  |
| C | -2.12189 | 2.37018  | 1.33185  |



|   |          |          |          |
|---|----------|----------|----------|
| C | -2.79523 | 3.31685  | 2.10519  |
| C | -3.86106 | 2.92136  | 2.9055   |
| C | -4.24551 | 1.58172  | 2.91843  |
| C | -3.54927 | 0.67224  | 2.13202  |
| C | -1.37256 | -1.53419 | 1.08132  |
| C | -1.0334  | -2.64816 | 0.30954  |
| C | -0.45389 | -3.80245 | 0.82089  |
| C | -0.21456 | -3.89193 | 2.18933  |
| C | -0.54812 | -2.81695 | 3.00775  |
| C | -1.09696 | -1.66328 | 2.44629  |
| C | -2.83491 | -0.2778  | -0.91017 |
| C | -3.75651 | -1.31254 | -1.09409 |
| C | -4.66433 | -1.3423  | -2.15238 |
| C | -4.6871  | -0.29817 | -3.07371 |
| C | -3.8047  | 0.76737  | -2.91712 |
| C | -2.9293  | 0.76096  | -1.83704 |
| F | -1.11325 | 2.85087  | 0.57076  |
| F | -2.42486 | 4.60337  | 2.07271  |
| F | -4.51644 | 3.81723  | 3.64965  |
| F | -5.27705 | 1.18858  | 3.67557  |
| F | -3.96745 | -0.61076 | 2.15457  |

|   |          |          |          |
|---|----------|----------|----------|
| F | -1.20418 | -2.61837 | -1.03505 |
| F | -0.08512 | -4.80206 | 0.00325  |
| F | 0.34232  | -4.98922 | 2.70672  |
| F | -0.31452 | -2.88671 | 4.32281  |
| F | -1.32943 | -0.65111 | 3.29825  |
| F | -2.1199  | 1.84286  | -1.71309 |
| F | -3.81077 | 1.78732  | -3.78685 |
| F | -5.54665 | -0.31785 | -4.09581 |
| F | -5.51485 | -2.36598 | -2.28942 |
| F | -3.80598 | -2.34793 | -0.23917 |
| C | 2.20381  | 1.22676  | -1.36197 |
| C | 3.49864  | 1.14204  | -0.65032 |
| C | 4.52816  | 2.06651  | -0.89953 |
| C | 3.73369  | 0.12824  | 0.29488  |
| C | 5.76046  | 1.96132  | -0.26088 |
| H | 4.36474  | 2.87748  | -1.59944 |
| C | 4.95666  | 0.01582  | 0.94724  |
| H | 2.94954  | -0.58456 | 0.52193  |
| C | 5.96794  | 0.93136  | 0.65625  |
| H | 6.55105  | 2.67237  | -0.47049 |
| H | 5.12321  | -0.77026 | 1.67449  |

|    |          |          |          |
|----|----------|----------|----------|
| C  | 1.64644  | 2.59993  | -1.50653 |
| O  | 2.03224  | 3.56227  | -0.87266 |
| O  | 0.62783  | 2.67514  | -2.39826 |
| C  | -0.08613 | 3.92909  | -2.42014 |
| H  | -0.91076 | 3.77646  | -3.11517 |
| H  | -0.46615 | 4.154    | -1.42218 |
| H  | 0.56994  | 4.73565  | -2.75448 |
| Br | 7.65774  | 0.77537  | 1.5301   |
| C  | 1.68001  | 0.08597  | -2.09566 |
| C  | 0.25255  | -0.06584 | -2.39175 |
| H  | -0.35834 | 0.80587  | -2.54808 |
| H  | -0.07045 | -1.0111  | -2.81331 |
| H  | 1.47359  | 0.43046  | -3.21234 |
| C  | 2.4882   | -1.19483 | -2.12463 |
| C  | 3.7695   | -1.20477 | -2.69049 |
| C  | 1.9722   | -2.37625 | -1.58587 |
| C  | 4.52395  | -2.37598 | -2.70054 |
| H  | 4.18368  | -0.28778 | -3.09878 |
| C  | 2.72848  | -3.54907 | -1.58776 |
| H  | 0.97413  | -2.38763 | -1.17619 |
| C  | 4.00833  | -3.54995 | -2.14267 |

H 5.51712 -2.37175 -3.13921

H 2.30514 -4.45077 -1.15598

H 4.60166 -4.4594 -2.14543

55

TS1A-N<sub>2</sub> SCF Done: E(RB3LYP) = -5386.72866268

C -1.9354 -2.87175 0.98616

N -0.51042 -1.57022 1.41744

N 0.36999 -1.01077 1.03223

C -3.12804 -2.07402 0.82036

C -4.24362 -2.14747 1.6889

C -3.19886 -1.19935 -0.288

C -5.37699 -1.37899 1.46027

H -4.22116 -2.84325 2.52085

C -4.31007 -0.39434 -0.50368

H -2.36264 -1.16672 -0.97664

C -5.39222 -0.4946 0.37533

H -6.23621 -1.44554 2.11808

H -4.3465 0.28381 -1.34723

C -1.8165 -3.86354 2.02912

O -2.61729 -4.79498 2.04264

|   |          |          |          |
|---|----------|----------|----------|
| O | -0.73451 | -3.79168 | 2.83726  |
| C | -0.55421 | -4.92749 | 3.70072  |
| H | 0.3263   | -4.69934 | 4.3016   |
| H | -1.42845 | -5.07277 | 4.34131  |
| H | -0.39335 | -5.83687 | 3.11514  |
| B | 1.95762  | 0.87568  | -0.5885  |
| C | 2.60124  | -0.32418 | -1.35972 |
| C | 3.22805  | -1.38685 | -0.69079 |
| C | 3.77148  | -2.48187 | -1.3526  |
| C | 3.7212   | -2.52969 | -2.74492 |
| C | 3.11965  | -1.49208 | -3.45566 |
| C | 2.56885  | -0.42334 | -2.75815 |
| C | 2.62429  | 1.4166   | 0.7203   |
| C | 1.86719  | 1.87456  | 1.80871  |
| C | 2.43842  | 2.32907  | 2.99137  |
| C | 3.82765  | 2.35634  | 3.10891  |
| C | 4.62402  | 1.92008  | 2.05138  |
| C | 4.01557  | 1.45424  | 0.89098  |
| C | 0.63771  | 1.53387  | -1.12405 |
| C | 0.37156  | 2.90495  | -0.99088 |
| C | -0.80043 | 3.50162  | -1.44599 |

|    |          |          |          |
|----|----------|----------|----------|
| C  | -1.77314 | 2.71241  | -2.05634 |
| C  | -1.54925 | 1.34728  | -2.21939 |
| C  | -0.3669  | 0.78681  | -1.75495 |
| F  | 3.29513  | -1.39792 | 0.65005  |
| F  | 4.34087  | -3.48176 | -0.67243 |
| F  | 4.24614  | -3.56627 | -3.39515 |
| F  | 3.07593  | -1.53631 | -4.79096 |
| F  | 2.00038  | 0.54966  | -3.49079 |
| F  | 0.52414  | 1.85998  | 1.75247  |
| F  | 1.67556  | 2.73998  | 4.00966  |
| F  | 4.3928   | 2.79797  | 4.23126  |
| F  | 5.95575  | 1.95076  | 2.16331  |
| F  | 4.82901  | 1.04761  | -0.09751 |
| F  | -0.23681 | -0.54479 | -1.90188 |
| F  | -2.48723 | 0.58342  | -2.79992 |
| F  | -2.91085 | 3.25601  | -2.48385 |
| F  | -1.00306 | 4.81387  | -1.29868 |
| F  | 1.27385  | 3.71548  | -0.41678 |
| Br | -6.92993 | 0.5896   | 0.08071  |

IN1D SCF Done: E(RB3LYP) = -3068.93728829

|    |          |          |          |
|----|----------|----------|----------|
| C  | -0.56319 | -1.07852 | -0.69577 |
| C  | 0.7094   | -0.53709 | -0.35588 |
| C  | 0.94425  | 0.82805  | -0.02405 |
| C  | 1.81697  | -1.42507 | -0.33563 |
| C  | 2.2106   | 1.27748  | 0.30844  |
| H  | 0.11515  | 1.52762  | -0.06806 |
| C  | 3.08344  | -0.99613 | 0.0365   |
| H  | 1.63809  | -2.46003 | -0.60786 |
| C  | 3.26732  | 0.35503  | 0.34876  |
| H  | 2.39302  | 2.31891  | 0.54783  |
| H  | 3.92291  | -1.68068 | 0.07001  |
| C  | -1.7302  | -0.24977 | -0.61782 |
| O  | -1.99133 | 0.50499  | -1.55348 |
| O  | -2.53171 | -0.45261 | 0.44917  |
| C  | -3.78033 | 0.2627   | 0.41454  |
| H  | -4.30188 | -0.0163  | 1.33015  |
| H  | -3.61225 | 1.34306  | 0.38579  |
| H  | -4.36667 | -0.02425 | -0.4625  |
| Br | 5.00066  | 0.96403  | 0.83268  |

**TS2D** SCF Done: E(RB3LYP) = -3003.20267797

|    |          |          |          |
|----|----------|----------|----------|
| C  | 2.54905  | -0.36188 | 0.63767  |
| C  | 1.1711   | -0.66809 | 0.43359  |
| C  | 0.66781  | -1.3046  | -0.73655 |
| C  | 0.23822  | -0.31574 | 1.44523  |
| C  | -0.68019 | -1.59543 | -0.87736 |
| H  | 1.35375  | -1.56709 | -1.53689 |
| C  | -1.11728 | -0.57699 | 1.30651  |
| H  | 0.60736  | 0.17595  | 2.33915  |
| C  | -1.56043 | -1.21444 | 0.14371  |
| H  | -1.05312 | -2.08574 | -1.7697  |
| H  | -1.8211  | -0.286   | 2.07746  |
| C  | 3.55283  | -0.66979 | -0.35538 |
| O  | 4.01543  | 0.11888  | -1.17441 |
| O  | 4.13902  | -1.90336 | -0.26528 |
| C  | 3.63873  | -2.86174 | 0.68395  |
| H  | 2.64999  | -3.23249 | 0.39315  |
| H  | 4.35151  | -3.68894 | 0.67289  |
| H  | 3.58646  | -2.43617 | 1.69289  |
| Br | -3.42236 | -1.56316 | -0.06781 |



|   |          |         |          |
|---|----------|---------|----------|
| C | 1.89284  | 2.35881 | -0.38823 |
| C | 2.75655  | 2.29078 | 0.64884  |
| H | 2.44655  | 2.43528 | 1.6794   |
| H | 3.81576  | 2.14768 | 0.46945  |
| H | 2.28424  | 2.16375 | -1.38404 |
| C | 0.44216  | 2.50933 | -0.2886  |
| C | -0.35851 | 2.08796 | -1.3688  |
| C | -0.20096 | 2.994   | 0.87011  |
| C | -1.74945 | 2.11656 | -1.28433 |
| H | 0.12248  | 1.71215 | -2.26834 |
| C | -1.59084 | 3.0387  | 0.94649  |
| H | 0.39407  | 3.3451  | 1.70824  |
| C | -2.37119 | 2.58998 | -0.12519 |
| H | -2.34945 | 1.76567 | -2.11953 |
| H | -2.06878 | 3.41915 | 1.84538  |
| H | -3.45544 | 2.61375 | -0.0586  |

55

TS1B-N<sub>2</sub> SCF Done: E(RB3LYP) = -5386.72988386

|   |          |          |          |
|---|----------|----------|----------|
| C | -0.23661 | -0.15258 | -1.72494 |
| N | 0.43952  | 1.44579  | -2.65426 |

|   |          |          |          |
|---|----------|----------|----------|
| N | 1.14439  | 2.29832  | -2.54626 |
| C | -1.67884 | -0.07846 | -1.70816 |
| C | -2.35197 | 1.13637  | -1.43909 |
| C | -2.45908 | -1.25475 | -1.82974 |
| C | -3.73063 | 1.18265  | -1.2997  |
| H | -1.78939 | 2.05721  | -1.36626 |
| C | -3.83542 | -1.22025 | -1.6411  |
| H | -1.96739 | -2.20386 | -2.00329 |
| C | -4.4672  | -0.00241 | -1.38431 |
| H | -4.22695 | 2.12575  | -1.10193 |
| H | -4.41755 | -2.1326  | -1.70342 |
| C | 0.46881  | -1.23472 | -2.39486 |
| O | 0.36888  | -2.36941 | -1.94007 |
| O | 1.27272  | -0.89539 | -3.41464 |
| C | 2.14458  | -1.94475 | -3.88383 |
| H | 2.66225  | -1.52355 | -4.74496 |
| H | 2.85778  | -2.21259 | -3.102   |
| H | 1.56681  | -2.82569 | -4.17176 |
| B | 1.189    | 0.14973  | 0.92703  |
| C | -0.07265 | 0.83472  | 1.57562  |
| C | -0.65746 | 1.9903   | 1.04493  |

|   |          |          |          |
|---|----------|----------|----------|
| C | -1.84909 | 2.53302  | 1.50598  |
| C | -2.48531 | 1.95151  | 2.59891  |
| C | -1.91676 | 0.83356  | 3.20482  |
| C | -0.7409  | 0.29783  | 2.68748  |
| C | 2.34306  | 1.02037  | 0.30254  |
| C | 3.15528  | 0.54633  | -0.7388  |
| C | 4.14743  | 1.30342  | -1.34796 |
| C | 4.39049  | 2.59782  | -0.89254 |
| C | 3.63366  | 3.10977  | 0.15816  |
| C | 2.63783  | 2.32344  | 0.73113  |
| C | 1.3584   | -1.40744 | 1.0475   |
| C | 2.60142  | -2.01696 | 1.27226  |
| C | 2.76781  | -3.39364 | 1.36456  |
| C | 1.65858  | -4.22556 | 1.22285  |
| C | 0.40164  | -3.66966 | 1.00332  |
| C | 0.27482  | -2.28889 | 0.93542  |
| F | -0.10169 | 2.60955  | -0.01708 |
| F | -2.4051  | 3.58074  | 0.88058  |
| F | -3.62901 | 2.45856  | 3.05824  |
| F | -2.50946 | 0.27969  | 4.26775  |
| F | -0.25455 | -0.78118 | 3.32143  |

|    |          |          |          |
|----|----------|----------|----------|
| F  | 2.9879   | -0.70071 | -1.21657 |
| F  | 4.86995  | 0.79996  | -2.35588 |
| F  | 5.34392  | 3.33861  | -1.45663 |
| F  | 3.87137  | 4.3461   | 0.60915  |
| F  | 1.96317  | 2.87399  | 1.75345  |
| F  | -0.96318 | -1.81202 | 0.72119  |
| F  | -0.66487 | -4.46265 | 0.85318  |
| F  | 1.80332  | -5.54933 | 1.29753  |
| F  | 3.97577  | -3.92603 | 1.58897  |
| F  | 3.70786  | -1.2667  | 1.42732  |
| Br | -6.35424 | 0.04838  | -1.14292 |

53

**IN1B** SCF Done: E(RB3LYP) = -5277.25794538

|   |          |          |          |
|---|----------|----------|----------|
| B | -0.07549 | -0.02361 | 0.17611  |
| C | -1.08561 | -1.2726  | 0.47191  |
| C | -2.03353 | -1.17747 | 1.49363  |
| C | -3.00905 | -2.14241 | 1.72563  |
| C | -3.07337 | -3.25888 | 0.89612  |
| C | -2.16822 | -3.38333 | -0.15362 |
| C | -1.20715 | -2.39419 | -0.35028 |

|   |          |          |          |
|---|----------|----------|----------|
| C | 1.38416  | -0.45439 | -0.51581 |
| C | 2.10055  | 0.3835   | -1.38374 |
| C | 3.30664  | 0.02433  | -1.97768 |
| C | 3.8659   | -1.21938 | -1.69193 |
| C | 3.20773  | -2.08217 | -0.81746 |
| C | 2.00582  | -1.68503 | -0.24266 |
| C | -0.98247 | 1.00877  | -0.71197 |
| C | -1.13951 | 0.81567  | -2.0886  |
| C | -2.02504 | 1.54722  | -2.87514 |
| C | -2.82004 | 2.52431  | -2.28154 |
| C | -2.70954 | 2.74956  | -0.91325 |
| C | -1.81109 | 1.99128  | -0.16417 |
| F | -2.05016 | -0.09331 | 2.29285  |
| F | -3.88949 | -2.00178 | 2.72599  |
| F | -4.00451 | -4.1976  | 1.09928  |
| F | -2.2302  | -4.44735 | -0.96686 |
| F | -0.37751 | -2.56794 | -1.40069 |
| F | 1.63123  | 1.60409  | -1.71073 |
| F | 3.93092  | 0.85951  | -2.81503 |
| F | 5.02518  | -1.57627 | -2.24326 |
| F | 3.74734  | -3.26902 | -0.524   |

|   |          |          |          |
|---|----------|----------|----------|
| F | 1.4543   | -2.54282 | 0.62868  |
| F | -1.75129 | 2.2788   | 1.15431  |
| F | -3.46155 | 3.69113  | -0.32657 |
| F | -3.67592 | 3.23976  | -3.01867 |
| F | -2.11924 | 1.3197   | -4.19163 |
| F | -0.41223 | -0.12515 | -2.72445 |
| C | 0.68343  | 0.53587  | 1.49562  |
| C | 1.04164  | 1.88224  | 1.85061  |
| C | 1.46034  | 2.18169  | 3.17907  |
| C | 0.9838   | 2.95343  | 0.92072  |
| C | 1.77926  | 3.47244  | 3.56075  |
| H | 1.48833  | 1.3971   | 3.9279   |
| C | 1.35136  | 4.23698  | 1.28292  |
| H | 0.6835   | 2.75849  | -0.09689 |
| C | 1.73619  | 4.4956   | 2.60428  |
| H | 2.06453  | 3.69379  | 4.58239  |
| H | 1.32663  | 5.04141  | 0.55736  |
| C | 1.15606  | -0.47998 | 2.51477  |
| O | 0.34247  | -0.99998 | 3.23883  |
| O | 2.46295  | -0.76555 | 2.66369  |
| C | 3.54641  | -0.03483 | 2.06135  |

|    |         |          |         |
|----|---------|----------|---------|
| H  | 3.29242 | 0.36894  | 1.08135 |
| H  | 3.84905 | 0.77841  | 2.72644 |
| H  | 4.36163 | -0.75119 | 1.95837 |
| Br | 2.20633 | 6.25631  | 3.10835 |

69

**TS2B** SCF Done: E(RB3LYP) = -5586.92717097

|   |          |          |          |
|---|----------|----------|----------|
| B | 1.04642  | 0.33327  | 0.15351  |
| C | 2.44956  | -0.53481 | 0.36568  |
| C | 3.26892  | -0.84242 | -0.73045 |
| C | 4.49034  | -1.50488 | -0.65931 |
| C | 5.00723  | -1.84311 | 0.58501  |
| C | 4.29561  | -1.47246 | 1.7179   |
| C | 3.07385  | -0.80828 | 1.59398  |
| C | 0.18513  | 0.60851  | 1.55621  |
| C | -0.42908 | 1.8273   | 1.87693  |
| C | -1.22321 | 2.03196  | 3.00331  |
| C | -1.4496  | 0.98363  | 3.88844  |
| C | -0.85999 | -0.24776 | 3.62714  |
| C | -0.06448 | -0.39654 | 2.4988   |
| C | 1.67174  | 1.75021  | -0.4588  |

|   |          |          |          |
|---|----------|----------|----------|
| C | 2.46372  | 2.508    | 0.42107  |
| C | 3.1777   | 3.64475  | 0.06005  |
| C | 3.13671  | 4.09115  | -1.2584  |
| C | 2.3739   | 3.38299  | -2.17583 |
| C | 1.67794  | 2.24745  | -1.76007 |
| F | 2.92414  | -0.44049 | -1.98071 |
| F | 5.18076  | -1.78402 | -1.77571 |
| F | 6.17992  | -2.47808 | 0.68897  |
| F | 4.80213  | -1.72743 | 2.93274  |
| F | 2.56133  | -0.3947  | 2.76715  |
| F | -0.28761 | 2.91715  | 1.08882  |
| F | -1.77245 | 3.23223  | 3.23709  |
| F | -2.2214  | 1.15619  | 4.96585  |
| F | -1.07204 | -1.28795 | 4.44846  |
| F | 0.46212  | -1.63002 | 2.33281  |
| F | 0.9461   | 1.65732  | -2.74775 |
| F | 2.30517  | 3.78918  | -3.45287 |
| F | 3.81477  | 5.18225  | -1.6303  |
| F | 3.90425  | 4.31156  | 0.9662   |
| F | 2.56708  | 2.13952  | 1.71347  |
| C | -0.26031 | -0.50536 | -0.68759 |



|    |          |          |          |
|----|----------|----------|----------|
| C  | -1.49984 | 0.23472  | -1.04761 |
| C  | -2.73647 | -0.41834 | -1.28849 |
| C  | -1.49702 | 1.63552  | -1.21791 |
| C  | -3.88516 | 0.27089  | -1.64867 |
| H  | -2.80631 | -1.49287 | -1.19976 |
| C  | -2.63801 | 2.34329  | -1.57991 |
| H  | -0.6021  | 2.1984   | -1.02476 |
| C  | -3.82808 | 1.65581  | -1.80484 |
| H  | -4.80854 | -0.26381 | -1.83557 |
| H  | -2.59745 | 3.42079  | -1.68808 |
| C  | -0.48394 | -1.90951 | -0.09277 |
| O  | 0.23635  | -2.86912 | -0.26862 |
| O  | -1.58317 | -1.95572 | 0.68765  |
| C  | -1.81914 | -3.20379 | 1.3719   |
| H  | -1.04852 | -3.35866 | 2.12716  |
| H  | -2.7977  | -3.09305 | 1.83839  |
| H  | -1.8124  | -4.03598 | 0.66435  |
| Br | -5.38231 | 2.60578  | -2.36142 |
| C  | -3.84746 | -1.45586 | -4.90944 |
| C  | -2.76818 | -2.04527 | -4.26873 |
| C  | -1.62805 | -1.27954 | -3.91751 |

|   |          |          |          |
|---|----------|----------|----------|
| C | -1.59186 | 0.09263  | -4.27431 |
| C | -2.67953 | 0.67733  | -4.90543 |
| C | -3.81051 | -0.08827 | -5.21239 |
| H | -4.7229  | -2.04593 | -5.16109 |
| H | -2.7979  | -3.09877 | -4.00367 |
| H | -0.73146 | 0.69836  | -4.02186 |
| H | -2.66076 | 1.73517  | -5.14506 |
| H | -4.66465 | 0.3818   | -5.69033 |
| C | -0.6164  | -1.88339 | -3.10467 |
| H | -0.77305 | -2.92704 | -2.83472 |
| C | 0.45654  | -1.23374 | -2.51558 |
| H | 0.7897   | -0.28413 | -2.89396 |
| H | 1.19853  | -1.86235 | -2.0497  |

71

**TS1C** SCF Done: E(RB3LYP) = -5696.43038290

|   |         |          |         |
|---|---------|----------|---------|
| B | 1.89243 | 0.12427  | 0.04376 |
| C | 1.894   | -0.60894 | 1.50418 |
| C | 0.91151 | -1.43041 | 2.04702 |
| C | 1.04045 | -2.09559 | 3.26505 |
| C | 2.21087 | -1.95373 | 4.00059 |

|   |          |          |          |
|---|----------|----------|----------|
| C | 3.23179  | -1.14731 | 3.49976  |
| C | 3.05415  | -0.50848 | 2.27754  |
| C | 2.10264  | 1.74444  | 0.05517  |
| C | 2.27046  | 2.42641  | -1.15444 |
| C | 2.38066  | 3.81015  | -1.25471 |
| C | 2.30029  | 4.58429  | -0.09945 |
| C | 2.10794  | 3.95538  | 1.1255   |
| C | 2.01417  | 2.56483  | 1.17866  |
| C | 2.94694  | -0.70672 | -0.88707 |
| C | 4.2294   | -0.27061 | -1.22646 |
| C | 5.11919  | -1.03039 | -1.98543 |
| C | 4.74158  | -2.29331 | -2.43178 |
| C | 3.48025  | -2.78007 | -2.10251 |
| C | 2.63212  | -1.99117 | -1.33186 |
| F | -0.27641 | -1.63645 | 1.41013  |
| F | 0.04172  | -2.86805 | 3.72383  |
| F | 2.35623  | -2.58184 | 5.17313  |
| F | 4.36667  | -0.99987 | 4.19553  |
| F | 4.07142  | 0.25732  | 1.83234  |
| F | 2.3237   | 1.73552  | -2.31144 |
| F | 2.54881  | 4.40318  | -2.44471 |

|   |          |          |          |
|---|----------|----------|----------|
| F | 2.38454  | 5.91732  | -0.17167 |
| F | 1.9717   | 4.68758  | 2.24205  |
| F | 1.74886  | 2.05044  | 2.39999  |
| F | 1.43511  | -2.55136 | -1.01284 |
| F | 3.09679  | -3.99808 | -2.51601 |
| F | 5.58161  | -3.0322  | -3.16565 |
| F | 6.33383  | -0.55431 | -2.29083 |
| F | 4.67362  | 0.93743  | -0.83364 |
| C | -1.70498 | 0.42397  | -1.22428 |
| C | -3.09543 | 0.74598  | -0.89806 |
| C | -3.61977 | 0.37893  | 0.35633  |
| C | -3.97121 | 1.26785  | -1.86628 |
| C | -4.9735  | 0.52649  | 0.63332  |
| H | -2.97162 | -0.07354 | 1.09775  |
| C | -5.32866 | 1.41471  | -1.5953  |
| H | -3.58874 | 1.56338  | -2.83821 |
| C | -5.82405 | 1.03608  | -0.34785 |
| H | -5.37031 | 0.21819  | 1.59303  |
| H | -5.99671 | 1.81777  | -2.3476  |
| C | -0.58462 | 0.46424  | -0.3374  |
| O | 0.51516  | -0.06489 | -0.69467 |

|    |          |          |          |
|----|----------|----------|----------|
| O  | -0.65449 | 0.9809   | 0.88259  |
| C  | -1.25902 | 2.27202  | 1.14248  |
| H  | -2.2504  | 2.13872  | 1.57495  |
| H  | -0.58841 | 2.75141  | 1.85449  |
| H  | -1.32724 | 2.85722  | 0.22355  |
| N  | -1.37692 | 0.3621   | -2.56667 |
| N  | -1.11275 | -0.48966 | -3.33992 |
| C  | -1.62263 | -2.24309 | -1.31869 |
| C  | -1.18766 | -2.19772 | -2.66013 |
| H  | -0.13512 | -2.41958 | -2.81252 |
| H  | -1.84056 | -2.59625 | -3.43316 |
| Br | -7.6903  | 1.19289  | 0.01335  |
| H  | -0.85026 | -2.25271 | -0.56269 |
| C  | -2.9716  | -2.48217 | -0.8664  |
| C  | -3.18038 | -2.83398 | 0.48768  |
| C  | -4.09934 | -2.33394 | -1.70466 |
| C  | -4.46507 | -3.05547 | 0.97248  |
| H  | -2.3223  | -2.92147 | 1.14811  |
| C  | -5.38143 | -2.53062 | -1.20757 |
| H  | -3.96653 | -2.03289 | -2.73916 |
| C  | -5.56973 | -2.89797 | 0.12998  |

H -4.60839 -3.33652 2.01151

H -6.24011 -2.38989 -1.85657

H -6.57409 -3.05005 0.51332

71

**IN2C** SCF Done: E(RB3LYP) = -5696.48680792

B 1.88745 0.04849 0.14983

C 1.97073 -0.65241 1.61782

C 1.02533 -1.48579 2.20858

C 1.23482 -2.14928 3.41677

C 2.43888 -1.98505 4.08846

C 3.41709 -1.15988 3.5393

C 3.16613 -0.52845 2.32878

C 2.03875 1.67114 0.09977

C 2.04803 2.31862 -1.13806

C 2.08354 3.70028 -1.28808

C 2.09176 4.50567 -0.15393

C 2.06307 3.91073 1.10125

C 2.0335 2.52118 1.20446

C 2.90979 -0.77354 -0.82462

C 4.1495 -0.29899 -1.25455

|   |          |          |          |
|---|----------|----------|----------|
| C | 5.02313  | -1.04386 | -2.04346 |
| C | 4.67295  | -2.33253 | -2.42814 |
| C | 3.45507  | -2.85758 | -2.01072 |
| C | 2.6173   | -2.082   | -1.21581 |
| F | -0.18722 | -1.70191 | 1.63269  |
| F | 0.28144  | -2.94288 | 3.93194  |
| F | 2.65734  | -2.61073 | 5.25309  |
| F | 4.58436  | -0.98792 | 4.17937  |
| F | 4.14754  | 0.25504  | 1.82771  |
| F | 2.00909  | 1.58952  | -2.27569 |
| F | 2.09969  | 4.26202  | -2.5076  |
| F | 2.11278  | 5.83992  | -0.27125 |
| F | 2.03176  | 4.67674  | 2.20457  |
| F | 1.94702  | 2.03246  | 2.45953  |
| F | 1.46397  | -2.67384 | -0.81614 |
| F | 3.10595  | -4.10542 | -2.3648  |
| F | 5.50069  | -3.06164 | -3.18901 |
| F | 6.19989  | -0.52741 | -2.43395 |
| F | 4.5705   | 0.93907  | -0.92125 |
| C | -1.77449 | -0.08208 | -1.1017  |
| C | -3.13841 | 0.49504  | -0.78423 |

|   |          |          |          |
|---|----------|----------|----------|
| C | -3.75157 | 0.22396  | 0.44731  |
| C | -3.86886 | 1.16998  | -1.76873 |
| C | -5.08483 | 0.55795  | 0.67212  |
| H | -3.19923 | -0.29182 | 1.22559  |
| C | -5.20387 | 1.5196   | -1.55486 |
| H | -3.41736 | 1.38762  | -2.73123 |
| C | -5.80587 | 1.18434  | -0.34555 |
| H | -5.55739 | 0.31068  | 1.61572  |
| H | -5.77098 | 2.00373  | -2.34084 |
| C | -0.61762 | 0.31439  | -0.19997 |
| O | 0.47488  | -0.23659 | -0.48996 |
| O | -0.63735 | 1.11463  | 0.82225  |
| C | -1.49255 | 2.28512  | 1.02684  |
| H | -2.17859 | 2.04503  | 1.8636   |
| H | -0.79155 | 3.0727   | 1.30873  |
| H | -2.04802 | 2.5361   | 0.10076  |
| N | -1.32145 | 0.35175  | -2.48526 |
| N | -1.0377  | -0.5842  | -3.2313  |
| C | -1.76649 | -1.69773 | -1.1842  |
| C | -1.20778 | -1.90659 | -2.60754 |
| H | -0.22747 | -2.40358 | -2.59577 |



|    |          |          |          |
|----|----------|----------|----------|
| H  | -1.86122 | -2.49979 | -3.26021 |
| Br | -7.66867 | 1.55147  | -0.09329 |
| H  | -1.04005 | -2.07802 | -0.47179 |
| C  | -3.09779 | -2.34807 | -0.88799 |
| C  | -3.29374 | -2.95103 | 0.36344  |
| C  | -4.17471 | -2.27408 | -1.78181 |
| C  | -4.5495  | -3.44619 | 0.72806  |
| H  | -2.46016 | -2.99292 | 1.06311  |
| C  | -5.43121 | -2.76485 | -1.41943 |
| H  | -4.04257 | -1.78773 | -2.74605 |
| C  | -5.62323 | -3.34369 | -0.15938 |
| H  | -4.68771 | -3.88368 | 1.70336  |
| H  | -6.26128 | -2.66721 | -2.10916 |
| H  | -6.59671 | -3.67636 | 0.13165  |

71

**TS2C** SCF Done: E(RB3LYP) = -5696.44758027

|   |          |         |          |
|---|----------|---------|----------|
| B | -1.84301 | 0.19917 | -0.05837 |
| C | -1.90334 | 1.72257 | -0.63339 |
| C | -0.94153 | 2.33091 | -1.43757 |
| C | -1.08106 | 3.61462 | -1.96348 |

|   |          |          |          |
|---|----------|----------|----------|
| C | -2.24101 | 4.33715  | -1.70715 |
| C | -3.24194 | 3.7636   | -0.92545 |
| C | -3.05512 | 2.48187  | -0.41934 |
| C | -2.10407 | -0.0063  | 1.54558  |
| C | -2.19282 | -1.29958 | 2.06448  |
| C | -2.25919 | -1.59712 | 3.42151  |
| C | -2.23101 | -0.55425 | 4.34323  |
| C | -2.12338 | 0.75338  | 3.8813   |
| C | -2.0596  | 1.00052  | 2.51011  |
| C | -2.77912 | -0.72153 | -1.03263 |
| C | -4.08601 | -1.09815 | -0.71665 |
| C | -4.89766 | -1.83935 | -1.57394 |
| C | -4.4061  | -2.23267 | -2.8152  |
| C | -3.11222 | -1.87274 | -3.17998 |
| C | -2.3373  | -1.12477 | -2.29606 |
| F | 0.21833  | 1.69618  | -1.75777 |
| F | -0.10853 | 4.15168  | -2.71725 |
| F | -2.39491 | 5.56983  | -2.20599 |
| F | -4.36648 | 4.44757  | -0.67419 |
| F | -4.05257 | 1.96429  | 0.32677  |
| F | -2.17043 | -2.3707  | 1.22833  |

|   |          |          |          |
|---|----------|----------|----------|
| F | -2.32732 | -2.86776 | 3.84447  |
| F | -2.28124 | -0.80821 | 5.65563  |
| F | -2.04401 | 1.76556  | 4.75825  |
| F | -1.87634 | 2.29012  | 2.16253  |
| F | -1.09837 | -0.78853 | -2.73634 |
| F | -2.62619 | -2.241   | -4.37572 |
| F | -5.16897 | -2.9487  | -3.64983 |
| F | -6.14152 | -2.18223 | -1.21243 |
| F | -4.62625 | -0.76276 | 0.47011  |
| C | 1.8315   | -0.77996 | 0.13418  |
| C | 3.14143  | -0.10463 | 0.22595  |
| C | 3.32714  | 1.14911  | -0.38898 |
| C | 4.22559  | -0.67895 | 0.91237  |
| C | 4.55295  | 1.8067   | -0.32275 |
| H | 2.50186  | 1.60839  | -0.92531 |
| C | 5.45557  | -0.03324 | 0.98265  |
| H | 4.10184  | -1.63935 | 1.39874  |
| C | 5.61158  | 1.20726  | 0.3614   |
| H | 4.68823  | 2.7689   | -0.80324 |
| H | 6.28459  | -0.48305 | 1.51662  |
| C | 0.65203  | -0.01451 | 0.31713  |

|    |          |          |          |
|----|----------|----------|----------|
| O  | -0.42505 | -0.40146 | -0.25225 |
| O  | 0.55637  | 1.09511  | 1.03404  |
| C  | 1.38187  | 1.39172  | 2.17915  |
| H  | 2.22831  | 2.01112  | 1.88035  |
| H  | 0.72253  | 1.94107  | 2.8521   |
| H  | 1.73449  | 0.47256  | 2.64845  |
| N  | 1.11304  | -2.1167  | 2.24214  |
| N  | 0.71617  | -3.05895 | 1.77206  |
| C  | 1.68771  | -2.09044 | -0.59833 |
| C  | 0.57651  | -3.00368 | -0.29846 |
| H  | -0.43269 | -2.62323 | -0.22409 |
| H  | 0.68555  | -4.04154 | -0.59915 |
| Br | 7.29597  | 2.09612  | 0.45215  |
| H  | 1.17949  | -1.75905 | -1.55145 |
| C  | 2.98787  | -2.79172 | -0.94247 |
| C  | 3.74592  | -2.3535  | -2.03375 |
| C  | 3.4598   | -3.85434 | -0.16392 |
| C  | 4.96103  | -2.96422 | -2.34023 |
| H  | 3.39028  | -1.52032 | -2.63397 |
| C  | 4.67739  | -4.46539 | -0.46901 |
| H  | 2.88426  | -4.20087 | 0.68959  |

|   |         |          |          |
|---|---------|----------|----------|
| C | 5.43076 | -4.02065 | -1.55642 |
| H | 5.54035 | -2.61485 | -3.18938 |
| H | 5.03564 | -5.28717 | 0.14377  |
| H | 6.37804 | -4.49541 | -1.79348 |

55

**E-IN1C** SCF Done: E(RB3LYP) = -5386.78022101

|   |         |          |          |
|---|---------|----------|----------|
| B | 1.39551 | 0.10783  | -0.08113 |
| C | 1.28246 | 1.06089  | -1.39975 |
| C | 0.22069 | 1.89982  | -1.73208 |
| C | 0.24257 | 2.76033  | -2.82927 |
| C | 1.37524 | 2.82544  | -3.63034 |
| C | 2.47309 | 2.02787  | -3.32099 |
| C | 2.40387 | 1.1817   | -2.22198 |
| C | 1.78624 | -1.45919 | -0.33165 |
| C | 1.98229 | -2.28911 | 0.77661  |
| C | 2.24693 | -3.65058 | 0.68949  |
| C | 2.30497 | -4.25047 | -0.56447 |
| C | 2.08702 | -3.47667 | -1.6967  |
| C | 1.82193 | -2.11407 | -1.56187 |
| C | 2.34069 | 0.91572  | 0.97964  |

|   |          |          |          |
|---|----------|----------|----------|
| C | 3.65195  | 0.5845   | 1.31506  |
| C | 4.42522  | 1.33067  | 2.20244  |
| C | 3.89233  | 2.47518  | 2.78363  |
| C | 2.5962   | 2.86093  | 2.46046  |
| C | 1.86048  | 2.08881  | 1.56785  |
| F | -0.9134  | 1.93133  | -0.99067 |
| F | -0.81978 | 3.53441  | -3.11039 |
| F | 1.41471  | 3.65228  | -4.68538 |
| F | 3.58105  | 2.08949  | -4.07834 |
| F | 3.49944  | 0.43454  | -1.95367 |
| F | 1.9108   | -1.77122 | 2.02433  |
| F | 2.43645  | -4.38955 | 1.79524  |
| F | 2.55441  | -5.56216 | -0.67706 |
| F | 2.11439  | -4.05012 | -2.91162 |
| F | 1.57104  | -1.45538 | -2.71317 |
| F | 0.62154  | 2.53943  | 1.26714  |
| F | 2.07179  | 3.97332  | 3.00252  |
| F | 4.62055  | 3.20316  | 3.64223  |
| F | 5.67975  | 0.95351  | 2.50178  |
| F | 4.24584  | -0.50711 | 0.78669  |
| C | -2.05442 | -0.87309 | 1.19522  |

|    |          |          |          |
|----|----------|----------|----------|
| C  | -3.51841 | -0.78219 | 1.01243  |
| C  | -4.04101 | 0.22805  | 0.18863  |
| C  | -4.39009 | -1.62313 | 1.71896  |
| C  | -5.41831 | 0.39818  | 0.07323  |
| H  | -3.37282 | 0.89748  | -0.34574 |
| C  | -5.76845 | -1.44322 | 1.62617  |
| H  | -3.99488 | -2.40968 | 2.35721  |
| C  | -6.26866 | -0.42851 | 0.80888  |
| H  | -5.81742 | 1.1834   | -0.55973 |
| H  | -6.43937 | -2.08508 | 2.18655  |
| C  | -1.02391 | -0.55522 | 0.24543  |
| O  | 0.03186  | -0.00025 | 0.68152  |
| O  | -1.10961 | -0.79774 | -1.03393 |
| C  | -2.03989 | -1.75197 | -1.61556 |
| H  | -2.97306 | -1.24463 | -1.8638  |
| H  | -1.53847 | -2.09546 | -2.52006 |
| H  | -2.21275 | -2.58254 | -0.92913 |
| N  | -1.57948 | -1.01421 | 2.42959  |
| N  | -1.17094 | -1.19643 | 3.46433  |
| Br | -8.15825 | -0.14305 | 0.71857  |

**E-TS3C** SCF Done: E(RB3LYP) = -5386.73751430

|   |         |          |          |
|---|---------|----------|----------|
| B | 1.30362 | 0.10001  | -0.05971 |
| C | 1.23398 | 1.05414  | -1.38328 |
| C | 0.1646  | 1.86709  | -1.75431 |
| C | 0.21039 | 2.74003  | -2.84099 |
| C | 1.37143 | 2.83869  | -3.59636 |
| C | 2.47363 | 2.06163  | -3.25208 |
| C | 2.38211 | 1.20629  | -2.16152 |
| C | 1.74758 | -1.45813 | -0.29135 |
| C | 1.9137  | -2.2843  | 0.82345  |
| C | 2.19844 | -3.6429  | 0.74738  |
| C | 2.30892 | -4.24291 | -0.50251 |
| C | 2.12317 | -3.4719  | -1.64269 |
| C | 1.83902 | -2.11287 | -1.51814 |
| C | 2.21401 | 0.91753  | 1.02845  |
| C | 3.53054 | 0.60769  | 1.36764  |
| C | 4.28846 | 1.35959  | 2.26302  |
| C | 3.73474 | 2.4906   | 2.85037  |
| C | 2.43362 | 2.85627  | 2.52411  |
| C | 1.71298 | 2.07826  | 1.62305  |



|   |          |          |          |
|---|----------|----------|----------|
| F | -1.00383 | 1.85945  | -1.06735 |
| F | -0.85797 | 3.49319  | -3.1568  |
| F | 1.43212  | 3.67594  | -4.6428  |
| F | 3.60724  | 2.15252  | -3.96801 |
| F | 3.484    | 0.48208  | -1.85697 |
| F | 1.78933  | -1.76778 | 2.06882  |
| F | 2.35791  | -4.37881 | 1.86076  |
| F | 2.57735  | -5.55248 | -0.60544 |
| F | 2.19767  | -4.04685 | -2.85563 |
| F | 1.61663  | -1.45788 | -2.67769 |
| F | 0.47047  | 2.51502  | 1.31713  |
| F | 1.891    | 3.95859  | 3.07023  |
| F | 4.44879  | 3.22515  | 3.71598  |
| F | 5.5489   | 1.00117  | 2.56259  |
| F | 4.15029  | -0.46688 | 0.83304  |
| C | -2.09801 | -1.20936 | 0.93717  |
| C | -3.48056 | -0.87764 | 0.96208  |
| C | -3.97345 | 0.27826  | 0.30095  |
| C | -4.39799 | -1.74377 | 1.60851  |
| C | -5.3352  | 0.53636  | 0.25177  |
| H | -3.27722 | 0.95681  | -0.18254 |

|    |          |          |          |
|----|----------|----------|----------|
| C  | -5.75654 | -1.47257 | 1.59459  |
| H  | -4.02262 | -2.62556 | 2.11822  |
| C  | -6.21041 | -0.33846 | 0.90689  |
| H  | -5.71255 | 1.40806  | -0.27072 |
| H  | -6.45854 | -2.13185 | 2.09201  |
| C  | -1.06649 | -0.68255 | 0.13904  |
| O  | -0.08834 | -0.01697 | 0.62319  |
| O  | -1.0081  | -0.99332 | -1.14506 |
| C  | -1.9299  | -1.93446 | -1.74714 |
| H  | -2.91313 | -1.47647 | -1.87476 |
| H  | -1.49037 | -2.16479 | -2.71714 |
| H  | -2.00114 | -2.83682 | -1.13307 |
| N  | -1.33595 | -0.90769 | 2.68187  |
| N  | -0.93814 | -1.31578 | 3.63307  |
| Br | -8.07684 | 0.02367  | 0.86421  |

53

*E*-IN3C SCF Done: E(RB3LYP) = -5277.23060857

|   |         |         |          |
|---|---------|---------|----------|
| B | 1.26344 | 0.04737 | -0.11641 |
| C | 1.24139 | 1.01405 | -1.43694 |
| C | 0.18536 | 1.83255 | -1.83392 |

|   |          |          |          |
|---|----------|----------|----------|
| C | 0.26381  | 2.71357  | -2.91213 |
| C | 1.44557  | 2.81393  | -3.63463 |
| C | 2.53516  | 2.03151  | -3.26439 |
| C | 2.41143  | 1.16977  | -2.18163 |
| C | 1.76063  | -1.49723 | -0.34133 |
| C | 1.95016  | -2.31858 | 0.77302  |
| C | 2.23938  | -3.67621 | 0.69884  |
| C | 2.34418  | -4.27912 | -0.54955 |
| C | 2.15377  | -3.50988 | -1.69023 |
| C | 1.86326  | -2.1522  | -1.56743 |
| C | 2.12227  | 0.87858  | 1.0024   |
| C | 3.45383  | 0.61438  | 1.32689  |
| C | 4.19909  | 1.39397  | 2.20805  |
| C | 3.61707  | 2.50899  | 2.79796  |
| C | 2.29917  | 2.82796  | 2.49018  |
| C | 1.59018  | 2.02132  | 1.60391  |
| F | -1.005   | 1.81836  | -1.18413 |
| F | -0.79365 | 3.47163  | -3.25318 |
| F | 1.53675  | 3.65622  | -4.67501 |
| F | 3.68777  | 2.1214   | -3.94976 |
| F | 3.50483  | 0.44385  | -1.85228 |

|   |          |          |          |
|---|----------|----------|----------|
| F | 1.85285  | -1.80043 | 2.01871  |
| F | 2.41104  | -4.40664 | 1.81423  |
| F | 2.61572  | -5.58844 | -0.65074 |
| F | 2.23084  | -4.08602 | -2.90303 |
| F | 1.64565  | -1.49887 | -2.72873 |
| F | 0.33108  | 2.4172   | 1.31129  |
| F | 1.73098  | 3.91727  | 3.03695  |
| F | 4.32104  | 3.27292  | 3.64639  |
| F | 5.47536  | 1.07833  | 2.48879  |
| F | 4.10624  | -0.4378  | 0.78684  |
| C | -2.16223 | -1.323   | 0.59057  |
| C | -3.46359 | -0.8936  | 0.77989  |
| C | -3.96424 | 0.32828  | 0.21639  |
| C | -4.37913 | -1.76482 | 1.45412  |
| C | -5.31005 | 0.62578  | 0.26846  |
| H | -3.2692  | 1.00253  | -0.2749  |
| C | -5.72521 | -1.46724 | 1.51383  |
| H | -3.99563 | -2.67943 | 1.89328  |
| C | -6.17664 | -0.28545 | 0.90118  |
| H | -5.69849 | 1.53406  | -0.17851 |
| H | -6.42469 | -2.1355  | 2.00242  |

|    |          |          |          |
|----|----------|----------|----------|
| C  | -1.0964  | -0.77087 | -0.11964 |
| O  | -0.16794 | -0.12207 | 0.48279  |
| O  | -0.91231 | -1.06527 | -1.39722 |
| C  | -1.95869 | -1.73907 | -2.139   |
| H  | -2.8478  | -1.11414 | -2.1902  |
| H  | -1.55301 | -1.88087 | -3.13475 |
| H  | -2.19287 | -2.69865 | -1.68042 |
| Br | -8.03015 | 0.08543  | 0.90803  |

69

**E-TS4C** SCF Done: E(RB3LYP) = -5586.90833017

|   |         |          |          |
|---|---------|----------|----------|
| B | 1.79905 | 0.07798  | -0.02815 |
| C | 2.28604 | 1.62131  | -0.26976 |
| C | 1.51628 | 2.76311  | -0.05528 |
| C | 2.01829 | 4.0585   | -0.18069 |
| C | 3.35173 | 4.2504   | -0.51705 |
| C | 4.16569 | 3.14067  | -0.72407 |
| C | 3.62189 | 1.86993  | -0.58816 |
| C | 2.05307 | -0.9725  | -1.26097 |
| C | 1.77458 | -2.32668 | -1.06423 |
| C | 1.85195 | -3.29067 | -2.06298 |

|   |         |          |          |
|---|---------|----------|----------|
| C | 2.21614 | -2.90581 | -3.34852 |
| C | 2.4845  | -1.56685 | -3.60323 |
| C | 2.39029 | -0.63542 | -2.57057 |
| C | 2.48064 | -0.3814  | 1.39431  |
| C | 3.61499 | -1.18572 | 1.50735  |
| C | 4.20486 | -1.51562 | 2.72565  |
| C | 3.66412 | -1.02249 | 3.90668  |
| C | 2.54284 | -0.20348 | 3.84703  |
| C | 1.9898  | 0.10599  | 2.60785  |
| F | 0.20957 | 2.68249  | 0.29673  |
| F | 1.22203 | 5.12266  | 0.02674  |
| F | 3.85086 | 5.48975  | -0.63998 |
| F | 5.45949 | 3.31028  | -1.04645 |
| F | 4.45769 | 0.82424  | -0.78631 |
| F | 1.39631 | -2.76907 | 0.16052  |
| F | 1.5758  | -4.5805  | -1.80219 |
| F | 2.29466 | -3.81426 | -4.33215 |
| F | 2.81274 | -1.17758 | -4.84806 |
| F | 2.61802 | 0.64795  | -2.92406 |
| F | 0.91829 | 0.93435  | 2.63186  |
| F | 2.01167 | 0.28901  | 4.97999  |

|   |          |          |          |
|---|----------|----------|----------|
| F | 4.21757  | -1.33226 | 5.08867  |
| F | 5.29088  | -2.30694 | 2.76957  |
| F | 4.20891  | -1.70586 | 0.41089  |
| C | -1.93368 | -0.28879 | -0.48225 |
| C | -3.15946 | 0.38507  | -0.35229 |
| C | -3.23889 | 1.75145  | 0.05238  |
| C | -4.36986 | -0.3035  | -0.65627 |
| C | -4.45962 | 2.39478  | 0.14456  |
| H | -2.32327 | 2.28502  | 0.28856  |
| C | -5.59594 | 0.33569  | -0.56159 |
| H | -4.31735 | -1.33417 | -0.98613 |
| C | -5.62737 | 1.67595  | -0.15912 |
| H | -4.5162  | 3.43422  | 0.44747  |
| H | -6.51273 | -0.1928  | -0.79613 |
| C | -0.63591 | 0.18902  | -0.63098 |
| O | 0.28889  | 0.00285  | 0.23907  |
| O | -0.24672 | 0.71664  | -1.79335 |
| C | -1.17995 | 0.88497  | -2.88074 |
| H | -1.91124 | 1.66164  | -2.64417 |
| H | -0.5678  | 1.1915   | -3.72908 |
| H | -1.68491 | -0.06166 | -3.09865 |

|    |          |          |          |
|----|----------|----------|----------|
| Br | -7.308   | 2.5557   | -0.02529 |
| C  | -2.74949 | -1.76206 | 1.99689  |
| C  | -1.43348 | -1.61872 | 1.7022   |
| H  | -0.88806 | -2.29584 | 1.05458  |
| H  | -0.84424 | -0.86682 | 2.21299  |
| H  | -3.18719 | -1.06145 | 2.70716  |
| C  | -3.69122 | -2.68952 | 1.39114  |
| C  | -5.05454 | -2.58948 | 1.73942  |
| C  | -3.31304 | -3.63424 | 0.41106  |
| C  | -6.01067 | -3.40394 | 1.13379  |
| H  | -5.35704 | -1.85887 | 2.48538  |
| C  | -4.26858 | -4.44286 | -0.1931  |
| H  | -2.27191 | -3.72217 | 0.11668  |
| C  | -5.62049 | -4.33071 | 0.16443  |
| H  | -7.05647 | -3.31198 | 1.41313  |
| H  | -3.96573 | -5.16351 | -0.94762 |
| H  | -6.36203 | -4.96497 | -0.31346 |

55

**Z-IN1C** SCF Done: E(RB3LYP) = -5386.78963100

|   |         |         |         |
|---|---------|---------|---------|
| C | 1.11668 | 1.16753 | 2.63834 |
|---|---------|---------|---------|



|   |          |          |          |
|---|----------|----------|----------|
| N | 1.55514  | 1.9382   | 3.63211  |
| N | 1.96454  | 2.6104   | 4.44124  |
| C | 2.17117  | 0.6106   | 1.7525   |
| C | 3.05626  | 1.47203  | 1.0879   |
| C | 2.35037  | -0.77522 | 1.65215  |
| C | 4.09806  | 0.95926  | 0.31819  |
| H | 2.92242  | 2.54693  | 1.16018  |
| C | 3.37968  | -1.29896 | 0.87199  |
| H | 1.69811  | -1.44497 | 2.19733  |
| C | 4.24889  | -0.425   | 0.22094  |
| H | 4.77363  | 1.6286   | -0.20165 |
| H | 3.50942  | -2.37243 | 0.79227  |
| C | -0.29513 | 0.90733  | 2.68868  |
| O | -1.02515 | 0.40532  | 1.79661  |
| O | -0.86269 | 1.24184  | 3.834    |
| C | -2.31509 | 1.17183  | 3.90946  |
| H | -2.55238 | 1.48228  | 4.92347  |
| H | -2.75029 | 1.85654  | 3.18024  |
| H | -2.65004 | 0.15445  | 3.71952  |
| B | -1.0676  | 0.13071  | 0.25574  |
| C | -0.16586 | 1.28631  | -0.4491  |

|   |          |          |          |
|---|----------|----------|----------|
| C | -0.51682 | 2.62359  | -0.24331 |
| C | 0.16872  | 3.69993  | -0.792   |
| C | 1.28491  | 3.45449  | -1.58708 |
| C | 1.68331  | 2.14364  | -1.81097 |
| C | 0.96261  | 1.09522  | -1.24326 |
| C | -2.67048 | 0.22829  | -0.09885 |
| C | -3.60367 | -0.4595  | 0.68285  |
| C | -4.96862 | -0.48667 | 0.41547  |
| C | -5.45603 | 0.18082  | -0.70272 |
| C | -4.56687 | 0.85868  | -1.52685 |
| C | -3.20764 | 0.86555  | -1.21817 |
| C | -0.6616  | -1.42239 | -0.01141 |
| C | -0.67947 | -1.89806 | -1.32396 |
| C | -0.44377 | -3.2215  | -1.67119 |
| C | -0.20311 | -4.15302 | -0.66468 |
| C | -0.2067  | -3.73619 | 0.65969  |
| C | -0.45496 | -2.39814 | 0.96042  |
| F | -1.58988 | 2.919    | 0.52891  |
| F | -0.22955 | 4.96277  | -0.56672 |
| F | 1.97643  | 4.47342  | -2.11449 |
| F | 2.79493  | 1.89493  | -2.52249 |

|    |          |          |          |
|----|----------|----------|----------|
| F  | 1.46779  | -0.13556 | -1.45763 |
| F  | -3.19662 | -1.17304 | 1.75978  |
| F  | -5.81354 | -1.16149 | 1.21279  |
| F  | -6.76604 | 0.1639   | -0.98506 |
| F  | -5.0226  | 1.49815  | -2.61678 |
| F  | -2.4181  | 1.53198  | -2.08738 |
| F  | -0.4511  | -2.09178 | 2.2818   |
| F  | 0.02186  | -4.62308 | 1.64258  |
| F  | 0.03035  | -5.43662 | -0.97072 |
| F  | -0.45737 | -3.61134 | -2.9559  |
| F  | -0.93768 | -1.03535 | -2.3327  |
| Br | 5.6972   | -1.14183 | -0.80495 |

55

**Z-TS3C** SCF Done: E(RB3LYP) = -5386.74443038

|   |         |          |         |
|---|---------|----------|---------|
| C | 1.04642 | 1.3016   | 2.257   |
| N | 1.65734 | 1.97513  | 3.93581 |
| N | 2.14807 | 2.79677  | 4.50027 |
| C | 2.18073 | 0.70983  | 1.6276  |
| C | 3.09979 | 1.55348  | 0.95504 |
| C | 2.3849  | -0.69115 | 1.58237 |

|   |          |          |          |
|---|----------|----------|----------|
| C | 4.14744  | 1.02316  | 0.22123  |
| H | 2.94151  | 2.62625  | 0.98606  |
| C | 3.42712  | -1.23053 | 0.84469  |
| H | 1.70398  | -1.34047 | 2.11725  |
| C | 4.29406  | -0.36933 | 0.16225  |
| H | 4.82573  | 1.66452  | -0.32765 |
| H | 3.56662  | -2.30335 | 0.78468  |
| C | -0.22956 | 0.80186  | 2.58023  |
| O | -1.08864 | 0.43941  | 1.71345  |
| O | -0.64357 | 0.8642   | 3.84025  |
| C | -2.0448  | 0.5681   | 4.07766  |
| H | -2.15451 | 0.62129  | 5.15965  |
| H | -2.67438 | 1.31195  | 3.58436  |
| H | -2.2888  | -0.42336 | 3.69764  |
| B | -1.09879 | 0.12289  | 0.18367  |
| C | -0.16396 | 1.24458  | -0.54034 |
| C | -0.47502 | 2.59385  | -0.33822 |
| C | 0.26168  | 3.64907  | -0.86565 |
| C | 1.38321  | 3.36652  | -1.64174 |
| C | 1.73646  | 2.04032  | -1.86917 |
| C | 0.96919  | 1.01581  | -1.3187  |

|   |          |          |          |
|---|----------|----------|----------|
| C | -2.68866 | 0.22211  | -0.19551 |
| C | -3.62742 | -0.46716 | 0.57781  |
| C | -4.99413 | -0.47227 | 0.31539  |
| C | -5.47419 | 0.2228   | -0.79131 |
| C | -4.57719 | 0.90198  | -1.60923 |
| C | -3.21598 | 0.88504  | -1.30458 |
| C | -0.67641 | -1.43811 | -0.03565 |
| C | -0.71182 | -1.94929 | -1.33618 |
| C | -0.46289 | -3.27933 | -1.65319 |
| C | -0.18413 | -4.18033 | -0.62627 |
| C | -0.16159 | -3.72709 | 0.68761  |
| C | -0.42512 | -2.38349 | 0.9543   |
| F | -1.54452 | 2.92164  | 0.41424  |
| F | -0.08771 | 4.92129  | -0.63184 |
| F | 2.12654  | 4.35878  | -2.14374 |
| F | 2.85821  | 1.75798  | -2.55038 |
| F | 1.4531   | -0.22873 | -1.50635 |
| F | -3.22414 | -1.2024  | 1.64308  |
| F | -5.8441  | -1.14535 | 1.10552  |
| F | -6.78329 | 0.23205  | -1.0673  |
| F | -5.02726 | 1.56583  | -2.68291 |

|    |          |          |          |
|----|----------|----------|----------|
| F  | -2.41672 | 1.55495  | -2.15766 |
| F  | -0.3771  | -2.03707 | 2.27162  |
| F  | 0.10945  | -4.57983 | 1.68771  |
| F  | 0.06366  | -5.46558 | -0.90276 |
| F  | -0.49373 | -3.70407 | -2.92278 |
| F  | -0.9908  | -1.11524 | -2.35826 |
| Br | 5.70031  | -1.10337 | -0.87267 |

53

**Z-IN3C** SCF Done: E(RB3LYP) = -5277.24196518

|   |         |          |          |
|---|---------|----------|----------|
| C | 0.99226 | 1.25711  | 2.04862  |
| C | 2.17324 | 0.66694  | 1.62292  |
| C | 3.15219 | 1.50822  | 1.00452  |
| C | 2.3857  | -0.74952 | 1.60898  |
| C | 4.21945 | 0.96599  | 0.31536  |
| H | 3.00592 | 2.58235  | 1.03684  |
| C | 3.46383 | -1.29511 | 0.94327  |
| H | 1.67594 | -1.3905  | 2.11551  |
| C | 4.34803 | -0.43165 | 0.27346  |
| H | 4.93008 | 1.60062  | -0.20013 |
| H | 3.60982 | -2.36852 | 0.90692  |

|   |          |          |          |
|---|----------|----------|----------|
| C | -0.2346  | 0.76867  | 2.49054  |
| O | -1.23071 | 0.50218  | 1.72088  |
| O | -0.45837 | 0.77299  | 3.7962   |
| C | -1.79419 | 0.40675  | 4.23415  |
| H | -1.76361 | 0.5266   | 5.31765  |
| H | -2.54011 | 1.06879  | 3.79416  |
| H | -2.0029  | -0.62757 | 3.95976  |
| B | -1.2047  | 0.17189  | 0.21711  |
| C | -0.27067 | 1.30736  | -0.5067  |
| C | -0.61517 | 2.65531  | -0.34012 |
| C | 0.11536  | 3.71635  | -0.86147 |
| C | 1.26533  | 3.44759  | -1.59634 |
| C | 1.65483  | 2.12634  | -1.78955 |
| C | 0.89057  | 1.09586  | -1.25063 |
| C | -2.78918 | 0.23176  | -0.1936  |
| C | -3.71992 | -0.45763 | 0.58881  |
| C | -5.08439 | -0.48049 | 0.32201  |
| C | -5.57009 | 0.19374  | -0.79291 |
| C | -4.68012 | 0.86844  | -1.61955 |
| C | -3.32073 | 0.86916  | -1.31265 |
| C | -0.74634 | -1.38265 | -0.01512 |

|    |          |          |          |
|----|----------|----------|----------|
| C  | -0.73996 | -1.88226 | -1.31963 |
| C  | -0.46995 | -3.20436 | -1.64555 |
| C  | -0.21292 | -4.11453 | -0.62353 |
| C  | -0.22765 | -3.67488 | 0.69312  |
| C  | -0.50818 | -2.33722 | 0.96953  |
| F  | -1.71715 | 2.9752   | 0.36738  |
| F  | -0.27054 | 4.98595  | -0.66084 |
| F  | 1.99607  | 4.44808  | -2.10081 |
| F  | 2.79178  | 1.85657  | -2.4515  |
| F  | 1.40658  | -0.14141 | -1.40698 |
| F  | -3.31286 | -1.1704  | 1.66485  |
| F  | -5.93086 | -1.15169 | 1.12133  |
| F  | -6.88189 | 0.18687  | -1.06925 |
| F  | -5.13654 | 1.51368  | -2.70623 |
| F  | -2.52358 | 1.53665  | -2.17534 |
| F  | -0.49344 | -2.00876 | 2.28915  |
| F  | 0.02395  | -4.53901 | 1.69073  |
| F  | 0.05026  | -5.39749 | -0.90832 |
| F  | -0.46313 | -3.61406 | -2.92432 |
| F  | -0.99995 | -1.04055 | -2.34595 |
| Br | 5.75727  | -1.18526 | -0.74025 |



69

**Z-TS4C** SCF Done: E(RB3LYP) = -5586.91838556

|   |          |          |          |
|---|----------|----------|----------|
| C | 0.96561  | 1.3024   | 1.27494  |
| C | 1.93943  | 0.49408  | 0.69567  |
| C | 2.90761  | 1.09495  | -0.16816 |
| C | 1.96967  | -0.92782 | 0.85574  |
| C | 3.80999  | 0.32421  | -0.88008 |
| H | 2.90307  | 2.17261  | -0.27938 |
| C | 2.8746   | -1.69934 | 0.15589  |
| H | 1.25696  | -1.39433 | 1.52568  |
| C | 3.78186  | -1.06413 | -0.71091 |
| H | 4.52653  | 0.78491  | -1.54847 |
| H | 2.88332  | -2.77772 | 0.26508  |
| C | -0.19081 | 1.03758  | 2.00485  |
| O | -1.35798 | 0.82414  | 1.49779  |
| O | -0.14273 | 1.22244  | 3.31916  |
| C | -1.3934  | 1.1612   | 4.05325  |
| H | -1.10418 | 1.31501  | 5.0929   |
| H | -2.06871 | 1.95377  | 3.72291  |
| H | -1.86425 | 0.18716  | 3.91967  |

|   |          |          |          |
|---|----------|----------|----------|
| B | -1.78546 | 0.21888  | 0.15117  |
| C | -0.78759 | 0.80216  | -1.00563 |
| C | -0.67405 | 2.18977  | -1.1496  |
| C | 0.22429  | 2.81044  | -2.00922 |
| C | 1.07488  | 2.02324  | -2.77729 |
| C | 0.99303  | 0.63837  | -2.68133 |
| C | 0.07055  | 0.05917  | -1.81503 |
| C | -3.34968 | 0.70125  | 0.01184  |
| C | -4.22432 | 0.50859  | 1.08486  |
| C | -5.57086 | 0.85818  | 1.05715  |
| C | -6.10543 | 1.41383  | -0.09965 |
| C | -5.28246 | 1.60366  | -1.20262 |
| C | -3.93848 | 1.24292  | -1.12986 |
| C | -1.8173  | -1.41559 | 0.26515  |
| C | -2.36978 | -2.13959 | -0.79394 |
| C | -2.53109 | -3.51829 | -0.79402 |
| C | -2.13335 | -4.24675 | 0.32403  |
| C | -1.57573 | -3.57651 | 1.40415  |
| C | -1.43845 | -2.18924 | 1.35738  |
| F | -1.46382 | 2.99922  | -0.41474 |
| F | 0.29424  | 4.14857  | -2.08965 |

|    |          |          |          |
|----|----------|----------|----------|
| F  | 1.9797   | 2.59025  | -3.58428 |
| F  | 1.85089  | -0.12568 | -3.37549 |
| F  | 0.12351  | -1.28813 | -1.73637 |
| F  | -3.78547 | -0.06443 | 2.22989  |
| F  | -6.35754 | 0.65434  | 2.12803  |
| F  | -7.40039 | 1.75752  | -0.15224 |
| F  | -5.79015 | 2.13063  | -2.33016 |
| F  | -3.21808 | 1.44676  | -2.25442 |
| F  | -0.86475 | -1.63154 | 2.45753  |
| F  | -1.17428 | -4.26551 | 2.48598  |
| F  | -2.27647 | -5.57964 | 0.35094  |
| F  | -3.06008 | -4.15306 | -1.85295 |
| F  | -2.75298 | -1.48035 | -1.91161 |
| Br | 5.01253  | -2.13264 | -1.68307 |
| C  | 6.65304  | 1.60984  | 0.77969  |
| C  | 5.6877   | 2.44591  | 1.33686  |
| C  | 4.71226  | 1.94199  | 2.2231   |
| C  | 4.75721  | 0.56951  | 2.55192  |
| C  | 5.72183  | -0.26364 | 1.99548  |
| C  | 6.66805  | 0.24893  | 1.09993  |
| H  | 7.38847  | 2.01613  | 0.09063  |

|   |         |          |         |
|---|---------|----------|---------|
| H | 5.66915 | 3.50139  | 1.07608 |
| H | 4.0318  | 0.15422  | 3.24401 |
| H | 5.73363 | -1.3194  | 2.25149 |
| H | 7.41305 | -0.40769 | 0.65971 |
| C | 3.66905 | 2.84387  | 2.71256 |
| H | 3.80331 | 3.89401  | 2.45482 |
| C | 2.54148 | 2.47712  | 3.35251 |
| H | 2.34644 | 1.45691  | 3.66403 |
| H | 1.80088 | 3.21413  | 3.64506 |

69

**TS5C** SCF Done: E(RB3LYP) = -5586.91474493

|   |         |          |          |
|---|---------|----------|----------|
| B | 1.56026 | -0.30651 | -0.28591 |
| C | 1.80773 | 0.07252  | -1.85429 |
| C | 0.91162 | 0.67937  | -2.72971 |
| C | 1.24872 | 1.07131  | -4.02526 |
| C | 2.54497 | 0.87435  | -4.48677 |
| C | 3.48559 | 0.28891  | -3.64164 |
| C | 3.10133 | -0.08418 | -2.35888 |
| C | 1.92374 | -1.8333  | 0.15881  |
| C | 1.87866 | -2.18214 | 1.51077  |

|   |          |          |          |
|---|----------|----------|----------|
| C | 2.0726   | -3.47271 | 1.99025  |
| C | 2.31653  | -4.50037 | 1.08261  |
| C | 2.34903  | -4.21181 | -0.27731 |
| C | 2.14405  | -2.90145 | -0.71119 |
| C | 2.29325  | 0.88543  | 0.56077  |
| C | 3.48137  | 0.75868  | 1.28212  |
| C | 4.09348  | 1.82673  | 1.93952  |
| C | 3.52196  | 3.09431  | 1.87888  |
| C | 2.35219  | 3.27396  | 1.14687  |
| C | 1.78291  | 2.18386  | 0.49779  |
| F | -0.37546 | 0.92807  | -2.37061 |
| F | 0.33201  | 1.64048  | -4.82491 |
| F | 2.88619  | 1.24559  | -5.72711 |
| F | 4.74158  | 0.09893  | -4.06888 |
| F | 4.04962  | -0.63061 | -1.5691  |
| F | 1.61882  | -1.23255 | 2.44253  |
| F | 2.01851  | -3.73648 | 3.30437  |
| F | 2.50193  | -5.75367 | 1.51414  |
| F | 2.55457  | -5.19851 | -1.16291 |
| F | 2.13837  | -2.72554 | -2.04742 |
| F | 0.66475  | 2.44097  | -0.22767 |

|   |          |          |          |
|---|----------|----------|----------|
| F | 1.78468  | 4.49269  | 1.0695   |
| F | 4.09062  | 4.12757  | 2.5106   |
| F | 5.22562  | 1.64244  | 2.63188  |
| F | 4.10328  | -0.42918 | 1.38397  |
| C | -2.18321 | -0.9812  | 0.30251  |
| C | -3.24112 | -0.08854 | -0.03612 |
| C | -2.99336 | 1.17124  | -0.64727 |
| C | -4.57959 | -0.4092  | 0.31828  |
| C | -4.03082 | 2.06071  | -0.90311 |
| H | -1.97581 | 1.45408  | -0.88869 |
| C | -5.61788 | 0.46462  | 0.05626  |
| H | -4.76971 | -1.36207 | 0.80224  |
| C | -5.33037 | 1.70196  | -0.54705 |
| H | -3.83339 | 3.02634  | -1.35231 |
| H | -6.63984 | 0.21661  | 0.31858  |
| C | -0.91408 | -0.86689 | -0.32207 |
| O | 0.04916  | -0.1706  | 0.13764  |
| O | -0.65547 | -1.60912 | -1.39145 |
| C | -1.70102 | -2.39752 | -1.98834 |
| H | -2.42314 | -1.74641 | -2.48777 |
| H | -1.19627 | -3.03102 | -2.71632 |

|    |          |          |          |
|----|----------|----------|----------|
| H  | -2.20512 | -2.99711 | -1.22406 |
| C  | -1.48665 | 3.66118  | 1.63025  |
| C  | -2.68098 | 4.37002  | 1.80038  |
| C  | -3.80322 | 3.73629  | 2.34421  |
| C  | -3.72783 | 2.40094  | 2.72513  |
| C  | -2.53425 | 1.6677   | 2.55786  |
| C  | -1.41454 | 2.32254  | 1.99928  |
| H  | -0.61457 | 4.14147  | 1.2015   |
| H  | -2.73749 | 5.41405  | 1.50634  |
| H  | -4.73299 | 4.28342  | 2.46668  |
| H  | -4.60156 | 1.90543  | 3.13988  |
| H  | -0.49543 | 1.77334  | 1.84144  |
| Br | -6.74724 | 2.92955  | -0.84353 |
| C  | -2.53283 | 0.25564  | 2.88414  |
| H  | -3.47385 | -0.1196  | 3.28582  |
| C  | -1.56157 | -0.66009 | 2.61225  |
| H  | -1.70219 | -1.69375 | 2.90375  |
| H  | -0.563   | -0.38142 | 2.3058   |

71

TS1A-2iso SCF Done: E(RB3LYP) = -5696.42738306

|   |          |          |          |
|---|----------|----------|----------|
| N | 0.11643  | 1.21238  | -0.64891 |
| N | -0.65928 | 0.31032  | -0.83351 |
| B | -1.71411 | -0.15109 | 0.27999  |
| C | -2.60851 | 1.12409  | 0.76174  |
| C | -2.93558 | 2.16625  | -0.10546 |
| C | -3.68687 | 3.2736   | 0.27737  |
| C | -4.19834 | 3.34107  | 1.5688   |
| C | -3.94687 | 2.29444  | 2.45335  |
| C | -3.16979 | 1.21609  | 2.03631  |
| C | -0.65019 | -0.77232 | 1.37107  |
| C | -0.07522 | -2.03306 | 1.19096  |
| C | 0.98991  | -2.51451 | 1.94881  |
| C | 1.54693  | -1.70901 | 2.93557  |
| C | 1.01173  | -0.44381 | 3.15769  |
| C | -0.05178 | 0.00082  | 2.37264  |
| C | -2.714   | -1.24291 | -0.39888 |
| C | -3.36528 | -2.19998 | 0.38165  |
| C | -4.28007 | -3.11614 | -0.12931 |
| C | -4.58489 | -3.08911 | -1.48806 |
| C | -3.96978 | -2.1465  | -2.30536 |
| C | -3.06129 | -1.24568 | -1.75035 |



|   |          |          |          |
|---|----------|----------|----------|
| F | -2.52224 | 2.14286  | -1.39331 |
| F | -3.9112  | 4.27885  | -0.59229 |
| F | -4.92725 | 4.39463  | 1.95541  |
| F | -4.44359 | 2.34187  | 3.69703  |
| F | -2.94892 | 0.24349  | 2.94045  |
| F | -0.49041 | -2.84503 | 0.18929  |
| F | 1.51139  | -3.72973 | 1.70485  |
| F | 2.60623  | -2.13238 | 3.63572  |
| F | 1.5514   | 0.35065  | 4.09     |
| F | -0.44119 | 1.26908  | 2.59148  |
| F | -2.52078 | -0.34872 | -2.60925 |
| F | -4.25759 | -2.10728 | -3.61524 |
| F | -5.46126 | -3.96096 | -2.00161 |
| F | -4.86489 | -4.02154 | 0.66745  |
| F | -3.10305 | -2.27732 | 1.7027   |
| C | 1.14537  | 1.66168  | -1.48722 |
| C | 2.50487  | 1.37866  | -0.91417 |
| C | 3.65559  | 2.01905  | -1.39754 |
| C | 2.64551  | 0.36744  | 0.0484   |
| C | 4.91618  | 1.63746  | -0.94419 |
| H | 3.56794  | 2.79608  | -2.14702 |

|    |          |          |          |
|----|----------|----------|----------|
| C  | 3.90006  | -0.01562 | 0.51257  |
| H  | 1.77528  | -0.14    | 0.43887  |
| C  | 5.03116  | 0.61661  | 0.00158  |
| H  | 5.80482  | 2.12547  | -1.3276  |
| H  | 3.98932  | -0.80032 | 1.25513  |
| C  | 0.87761  | 3.09031  | -1.97223 |
| O  | 1.54315  | 3.63779  | -2.82526 |
| O  | -0.20047 | 3.59667  | -1.38165 |
| C  | -0.69685 | 4.86249  | -1.87113 |
| H  | -1.71883 | 4.92321  | -1.50049 |
| H  | -0.0841  | 5.67691  | -1.4776  |
| H  | -0.67206 | 4.88155  | -2.96246 |
| Br | 6.75975  | 0.06416  | 0.58349  |
| C  | 2.05892  | 0.02236  | -3.46283 |
| C  | 0.87032  | 0.68736  | -3.1664  |
| H  | 0.60033  | 1.48593  | -3.84931 |
| H  | 0.02514  | 0.12144  | -2.74843 |
| C  | 2.5603   | -1.15391 | -2.81312 |
| C  | 3.92313  | -1.4958  | -2.98474 |
| C  | 1.76265  | -1.95384 | -1.95608 |
| C  | 4.47709  | -2.56818 | -2.29843 |

|   |         |          |          |
|---|---------|----------|----------|
| H | 4.54306 | -0.88814 | -3.63782 |
| C | 2.31196 | -3.04674 | -1.30253 |
| H | 0.71783 | -1.71249 | -1.79541 |
| C | 3.67212 | -3.34483 | -1.45739 |
| H | 5.53102 | -2.80049 | -2.41211 |
| H | 1.69165 | -3.64601 | -0.64826 |
| H | 4.10386 | -4.18209 | -0.91718 |
| H | 2.73092 | 0.4899   | -4.18077 |

71

**TS1C-2iso** SCF Done: E(RB3LYP) = -5696.40625435

|   |          |          |          |
|---|----------|----------|----------|
| B | -1.49333 | -0.29864 | 0.20664  |
| C | -1.50921 | -1.11562 | 1.61449  |
| C | -0.41215 | -1.50396 | 2.37747  |
| C | -0.52112 | -2.12352 | 3.62171  |
| C | -1.77843 | -2.3574  | 4.16321  |
| C | -2.90852 | -1.97017 | 3.44759  |
| C | -2.74888 | -1.35747 | 2.21188  |
| C | -2.27443 | -0.9811  | -1.05293 |
| C | -2.34117 | -0.28736 | -2.26413 |
| C | -2.91841 | -0.79635 | -3.42075 |

|   |          |          |          |
|---|----------|----------|----------|
| C | -3.46635 | -2.0751  | -3.39675 |
| C | -3.41141 | -2.81463 | -2.22205 |
| C | -2.81484 | -2.2662  | -1.08731 |
| C | -1.94585 | 1.23588  | 0.53622  |
| C | -3.19215 | 1.78408  | 0.23217  |
| C | -3.54297 | 3.09878  | 0.53244  |
| C | -2.62555 | 3.92727  | 1.16829  |
| C | -1.3801  | 3.41654  | 1.51531  |
| C | -1.07787 | 2.093    | 1.21423  |
| F | 0.85946  | -1.31212 | 1.93699  |
| F | 0.58011  | -2.49138 | 4.29718  |
| F | -1.90384 | -2.95135 | 5.35776  |
| F | -4.13132 | -2.18904 | 3.95695  |
| F | -3.8744  | -0.9926  | 1.55792  |
| F | -1.80927 | 0.95611  | -2.3596  |
| F | -2.95004 | -0.07343 | -4.55191 |
| F | -4.02972 | -2.59026 | -4.49734 |
| F | -3.91693 | -4.05896 | -2.19309 |
| F | -2.7668  | -3.07357 | -0.00724 |
| F | 0.13777  | 1.65284  | 1.61889  |
| F | -0.47371 | 4.20598  | 2.11925  |

|   |          |          |          |
|---|----------|----------|----------|
| F | -2.93925 | 5.19871  | 1.44979  |
| F | -4.75494 | 3.57448  | 0.20385  |
| F | -4.13658 | 1.05045  | -0.39198 |
| C | 1.96643  | -0.59491 | -1.5048  |
| C | 3.19545  | -0.28207 | -0.70016 |
| C | 3.06641  | 0.34808  | 0.54646  |
| C | 4.47741  | -0.49614 | -1.23045 |
| C | 4.19339  | 0.78126  | 1.2416   |
| H | 2.08955  | 0.54171  | 0.9687   |
| C | 5.60897  | -0.07727 | -0.5356  |
| H | 4.60933  | -0.98705 | -2.18881 |
| C | 5.45545  | 0.56899  | 0.69116  |
| H | 4.07951  | 1.28974  | 2.1921   |
| H | 6.59568  | -0.24249 | -0.95434 |
| C | 0.74597  | -1.02153 | -0.76167 |
| O | -0.02544 | -0.11686 | -0.3491  |
| O | 0.36642  | -2.26365 | -0.63513 |
| C | 1.25572  | -3.39043 | -0.35946 |
| H | 1.30408  | -3.48294 | 0.72635  |
| H | 0.77012  | -4.25673 | -0.80506 |
| H | 2.24587  | -3.2411  | -0.78496 |

|    |         |          |          |
|----|---------|----------|----------|
| N  | 2.2464  | -1.62975 | -2.52692 |
| N  | 2.3756  | -1.62203 | -3.67968 |
| C  | 1.34492 | 2.06545  | -1.70586 |
| C  | 1.4966  | 0.94848  | -2.53011 |
| H  | 0.5867  | 0.56765  | -2.99184 |
| H  | 2.36527 | 0.8797   | -3.18926 |
| Br | 7.00641 | 1.18136  | 1.62828  |
| H  | 0.35036 | 2.26051  | -1.31594 |
| C  | 2.39868 | 2.91474  | -1.20718 |
| C  | 2.11734 | 3.80499  | -0.14128 |
| C  | 3.72558 | 2.87482  | -1.70183 |
| C  | 3.11911 | 4.58642  | 0.42619  |
| H  | 1.11053 | 3.85477  | 0.25952  |
| C  | 4.72255 | 3.65715  | -1.13112 |
| H  | 3.97372 | 2.2149   | -2.52709 |
| C  | 4.42917 | 4.51229  | -0.05962 |
| H  | 2.88055 | 5.24832  | 1.25518  |
| H  | 5.73718 | 3.59872  | -1.51557 |
| H  | 5.21443 | 5.11507  | 0.38907  |

TS1D-N<sub>2</sub> SCF Done: E(RB3LYP) = -3178.44662283

|   |          |          |          |
|---|----------|----------|----------|
| C | -2.04363 | 0.38273  | 0.65535  |
| N | -2.61212 | 1.92641  | -0.46158 |
| N | -2.95131 | 2.98532  | -0.45959 |
| C | -0.63201 | 0.21815  | 0.39878  |
| C | -0.07496 | -0.97643 | -0.11768 |
| C | 0.24918  | 1.27155  | 0.73578  |
| C | 1.29769  | -1.11495 | -0.27695 |
| H | -0.73033 | -1.80922 | -0.34681 |
| C | 1.6181   | 1.16232  | 0.53349  |
| H | -0.16626 | 2.18361  | 1.1527   |
| C | 2.13307  | -0.03821 | 0.0345   |
| H | 1.72132  | -2.03868 | -0.65406 |
| H | 2.28529  | 1.98058  | 0.77835  |
| C | -3.00794 | -0.64233 | 0.33719  |
| O | -2.89715 | -1.73465 | 0.88935  |
| O | -4.06094 | -0.29522 | -0.4354  |
| C | -5.08544 | -1.29952 | -0.53724 |
| H | -5.83859 | -0.88003 | -1.20444 |
| H | -4.68081 | -2.22711 | -0.95125 |
| H | -5.51796 | -1.51247 | 0.44415  |

Br 4.01351 -0.21504 -0.21203

37

**TS1E** SCF Done: E(RB3LYP) = -3488.14699409

N -0.15301 1.11291 0.68976

N 0.62396 0.2546 0.91199

C -1.25606 1.62478 1.34302

C -2.53984 1.57573 0.64012

C -3.67232 2.28314 1.08777

C -2.69458 0.69647 -0.45119

C -4.91104 2.10518 0.47735

H -3.58263 2.95402 1.93082

C -3.92813 0.51306 -1.0619

H -1.84055 0.13898 -0.82122

C -5.03563 1.2143 -0.58575

H -5.77722 2.64914 0.83647

H -4.03307 -0.17692 -1.89095

C -0.9314 2.6055 2.40013

O -1.75276 3.17474 3.09964

O 0.40392 2.73724 2.58041

C 0.7874 3.5951 3.66752



|    |          |          |          |
|----|----------|----------|----------|
| H  | 1.87716  | 3.60095  | 3.66275  |
| H  | 0.39551  | 4.60456  | 3.51909  |
| H  | 0.4079   | 3.20783  | 4.61722  |
| Br | -6.74447 | 0.93965  | -1.39633 |
| C  | -1.20159 | -0.24551 | 2.88533  |
| C  | 0.11733  | -0.6244  | 2.58159  |
| H  | 0.91846  | -0.20363 | 3.18276  |
| H  | 0.32001  | -1.6255  | 2.21535  |
| H  | -1.36686 | 0.46893  | 3.68547  |
| C  | -2.38743 | -0.9608  | 2.42395  |
| C  | -3.65769 | -0.55826 | 2.8832   |
| C  | -2.32939 | -1.99361 | 1.46594  |
| C  | -4.8184  | -1.16018 | 2.408    |
| H  | -3.7241  | 0.25485  | 3.60088  |
| C  | -3.4911  | -2.6042  | 1.00159  |
| H  | -1.37021 | -2.31491 | 1.07209  |
| C  | -4.74188 | -2.18694 | 1.46354  |
| H  | -5.78619 | -0.81975 | 2.76406  |
| H  | -3.42187 | -3.3983  | 0.26349  |
| H  | -5.64791 | -2.65194 | 1.08706  |

**TS1F** SCF Done: E(RB3LYP) = -3488.12288841

|   |          |          |          |
|---|----------|----------|----------|
| N | -0.22431 | 1.84166  | -0.3643  |
| N | -1.23971 | 1.31765  | -0.1701  |
| C | 0.91737  | 1.65401  | -1.24987 |
| C | 2.12547  | 1.21391  | -0.45712 |
| C | 3.41643  | 1.33632  | -0.98994 |
| C | 1.96009  | 0.53102  | 0.75804  |
| C | 4.51056  | 0.76353  | -0.34439 |
| H | 3.56096  | 1.84274  | -1.93424 |
| C | 3.04861  | -0.0369  | 1.41401  |
| H | 0.9762   | 0.42627  | 1.20197  |
| C | 4.31776  | 0.07109  | 0.84688  |
| H | 5.49929  | 0.83541  | -0.78163 |
| H | 2.9103   | -0.56925 | 2.34798  |
| C | 1.07235  | 2.88844  | -2.12227 |
| O | 1.95439  | 3.02348  | -2.94422 |
| O | 0.06178  | 3.75962  | -1.96119 |
| C | 0.09322  | 4.90181  | -2.84002 |
| H | -0.7808  | 5.49509  | -2.5741  |
| H | 1.0118   | 5.4736   | -2.68747 |

|    |          |          |          |
|----|----------|----------|----------|
| H  | 0.0435   | 4.58262  | -3.88413 |
| Br | 5.80525  | -0.76273 | 1.70715  |
| C  | 1.47639  | -0.02026 | -3.24252 |
| C  | 0.42355  | 0.34042  | -2.37817 |
| H  | -0.44357 | 0.80867  | -2.85111 |
| H  | 0.09397  | -0.38861 | -1.63217 |
| C  | 2.52108  | -0.96651 | -2.95962 |
| C  | 3.62778  | -1.06139 | -3.84016 |
| C  | 2.526    | -1.80838 | -1.81894 |
| C  | 4.68796  | -1.92148 | -3.58009 |
| H  | 3.64762  | -0.4304  | -4.72522 |
| C  | 3.59079  | -2.66028 | -1.55969 |
| H  | 1.70161  | -1.76745 | -1.11569 |
| C  | 4.68267  | -2.72284 | -2.43364 |
| H  | 5.52726  | -1.96425 | -4.2689  |
| H  | 3.57765  | -3.27603 | -0.66487 |
| H  | 5.51611  | -3.38577 | -2.22232 |
| H  | 1.58437  | 0.55192  | -4.15969 |

14

Re1 SCF Done: E(RB3LYP) = -415.94861405

|   |          |         |          |
|---|----------|---------|----------|
| C | -6.41406 | 3.0625  | 0.       |
| O | -5.95931 | 1.81704 | -0.28908 |
| O | -5.72615 | 4.0639  | 0.04566  |
| C | -7.85116 | 3.06965 | 0.25041  |
| N | -8.55293 | 1.96928 | 0.18304  |
| N | -9.15444 | 1.00517 | 0.12273  |
| C | -4.53903 | 1.7003  | -0.54881 |
| H | -4.21071 | 2.5801  | -1.10693 |
| H | -8.37598 | 3.9807  | 0.49578  |
| C | -3.74967 | 1.54123 | 0.7409   |
| H | -2.69132 | 1.38022 | 0.51039  |
| H | -3.83359 | 2.44117 | 1.35466  |
| H | -4.11016 | 0.68332 | 1.31592  |
| H | -4.45403 | 0.81544 | -1.18384 |

48

**IN1G** SCF Done: E(RB3LYP) = -2624.24040218

|   |         |         |         |
|---|---------|---------|---------|
| C | 1.19745 | 1.08417 | 2.27581 |
| O | 1.1941  | 1.17726 | 3.58395 |
| O | 0.35101 | 0.33336 | 1.70752 |
| C | 2.17771 | 1.85939 | 1.59987 |

|   |          |          |          |
|---|----------|----------|----------|
| N | 3.07595  | 2.50516  | 2.31426  |
| N | 3.87023  | 3.03953  | 2.91317  |
| C | 0.15286  | 0.45903  | 4.3415   |
| H | -0.79649 | 0.60103  | 3.82138  |
| H | 2.26363  | 1.94235  | 0.52873  |
| C | 0.51277  | -1.00639 | 4.5055   |
| H | -0.24825 | -1.48636 | 5.13082  |
| H | 0.54416  | -1.5201  | 3.53877  |
| H | 1.48345  | -1.11807 | 5.       |
| H | 0.13676  | 0.9908   | 5.29616  |
| B | 0.02657  | 0.06144  | 0.20428  |
| C | -0.87367 | 1.29373  | -0.37287 |
| C | -1.3331  | 2.39819  | 0.34202  |
| C | -2.20355 | 3.34751  | -0.1941  |
| C | -2.65603 | 3.20724  | -1.49888 |
| C | -2.23258 | 2.11508  | -2.25138 |
| C | -1.3701  | 1.19272  | -1.67504 |
| C | 1.45263  | -0.23177 | -0.53743 |
| C | 1.99255  | 0.45518  | -1.62413 |
| C | 3.22329  | 0.13505  | -2.19642 |
| C | 3.97252  | -0.91046 | -1.67348 |

|   |          |          |          |
|---|----------|----------|----------|
| C | 3.48268  | -1.61994 | -0.58052 |
| C | 2.25139  | -1.2675  | -0.04347 |
| C | -0.94595 | -1.25868 | 0.24999  |
| C | -1.99651 | -1.33967 | 1.16788  |
| C | -2.88272 | -2.41091 | 1.23618  |
| C | -2.75361 | -3.46088 | 0.33389  |
| C | -1.74254 | -3.41458 | -0.61721 |
| C | -0.87273 | -2.32693 | -0.64601 |
| F | -0.95338 | 2.62361  | 1.6241   |
| F | -2.60831 | 4.39373  | 0.54504  |
| F | -3.48924 | 4.11272  | -2.02957 |
| F | -2.66303 | 1.96419  | -3.51427 |
| F | -0.99662 | 0.14294  | -2.44106 |
| F | 1.36138  | 1.52222  | -2.16043 |
| F | 3.6959   | 0.84076  | -3.23612 |
| F | 5.15938  | -1.22583 | -2.20671 |
| F | 4.19985  | -2.62943 | -0.06267 |
| F | 1.82309  | -1.99223 | 1.01591  |
| F | 0.06435  | -2.3615  | -1.61709 |
| F | -1.61245 | -4.41567 | -1.50367 |
| F | -3.59935 | -4.49973 | 0.37472  |

F -3.86724 -2.43263 2.15014

F -2.21571 -0.33201 2.04578

48

**TS1G-N<sub>2</sub>** SCF Done: E(RB3LYP) = -2624.17070181

C -3.47656 1.23437 0.

O -3.39293 1.5358 1.27583

O -4.4413 0.49978 -0.38697

C -2.38091 1.58117 -0.87376

N -1.3251 2.83185 0.30889

N -0.33562 3.09577 0.73381

C -4.44374 1.03573 2.1769

H -5.39643 1.07997 1.64995

H -2.5436 2.38358 -1.58976

C -4.11404 -0.3649 2.6576

H -4.87796 -0.68658 3.37247

H -4.1056 -1.07284 1.82573

H -3.14264 -0.39075 3.1587

H -4.4338 1.76402 2.98883

B -4.72776 0.2586 -1.90049

C -5.61107 1.50769 -2.48494

|   |          |          |          |
|---|----------|----------|----------|
| C | -6.03365 | 2.63599  | -1.78181 |
| C | -6.87768 | 3.60796  | -2.31973 |
| C | -7.33847 | 3.47144  | -3.62335 |
| C | -6.94245 | 2.36532  | -4.3718  |
| C | -6.10197 | 1.42278  | -3.79185 |
| C | -3.22673 | 0.06169  | -2.55933 |
| C | -2.69889 | 0.74866  | -3.66931 |
| C | -1.49982 | 0.40585  | -4.28276 |
| C | -0.77171 | -0.68074 | -3.80316 |
| C | -1.24049 | -1.40131 | -2.70561 |
| C | -2.43825 | -1.02452 | -2.12039 |
| C | -5.65753 | -1.08652 | -1.91888 |
| C | -6.73216 | -1.2025  | -1.03116 |
| C | -7.593   | -2.29595 | -0.99794 |
| C | -7.40499 | -3.33787 | -1.90089 |
| C | -6.3631  | -3.26169 | -2.81871 |
| C | -5.52308 | -2.14953 | -2.81338 |
| F | -5.62654 | 2.86748  | -0.50689 |
| F | -7.24267 | 4.67034  | -1.58812 |
| F | -8.14536 | 4.39468  | -4.15621 |
| F | -7.3702  | 2.22294  | -5.63264 |



|   |          |          |          |
|---|----------|----------|----------|
| F | -5.73762 | 0.37579  | -4.5626  |
| F | -3.30706 | 1.84618  | -4.14766 |
| F | -1.03297 | 1.11182  | -5.31828 |
| F | 0.3815   | -1.01495 | -4.37665 |
| F | -0.53392 | -2.4347  | -2.2356  |
| F | -2.84924 | -1.74824 | -1.06712 |
| F | -4.54269 | -2.14825 | -3.74131 |
| F | -6.17428 | -4.25451 | -3.69833 |
| F | -8.22013 | -4.39794 | -1.88846 |
| F | -8.59997 | -2.34858 | -0.11425 |
| F | -6.9958  | -0.21133 | -0.1483  |

15

Re2 SCF Done: E(RB3LYP) = -508.18497265

|   |          |          |          |
|---|----------|----------|----------|
| C | -4.83594 | 0.92187  | 0.       |
| O | -5.73398 | 1.92227  | -0.09661 |
| O | -5.07157 | -0.26258 | -0.07054 |
| C | -3.47207 | 1.45975  | 0.20515  |
| N | -3.29701 | 2.76965  | 0.26031  |
| N | -3.17736 | 3.89518  | 0.30396  |
| C | -7.12017 | 1.52641  | -0.29586 |

|   |          |          |          |
|---|----------|----------|----------|
| H | -7.14082 | 0.6643   | -0.96578 |
| C | -7.80231 | 1.22061  | 1.02663  |
| H | -8.85959 | 0.99804  | 0.85003  |
| H | -7.3461  | 0.35097  | 1.50549  |
| H | -7.74111 | 2.07559  | 1.70593  |
| H | -7.56984 | 2.3868   | -0.79536 |
| C | -2.33207 | 0.63066  | 0.34569  |
| N | -1.38969 | -0.04302 | 0.46286  |

49

**IN1J** SCF Done: E(RB3LYP) = -2716.46385887

|   |          |          |         |
|---|----------|----------|---------|
| C | -1.35513 | -0.31461 | 2.36098 |
| O | -1.44499 | 0.06699  | 3.60692 |
| O | -0.36197 | 0.00923  | 1.67214 |
| C | -2.46372 | -1.12953 | 1.90773 |
| N | -3.54003 | -1.13763 | 2.69226 |
| N | -4.47203 | -1.10603 | 3.32186 |
| C | -0.37894 | 0.93173  | 4.17364 |
| H | 0.56583  | 0.65929  | 3.69483 |
| C | -0.74156 | 2.38991  | 3.97175 |
| H | 0.01382  | 3.01347  | 4.46306 |

|   |          |          |          |
|---|----------|----------|----------|
| H | -0.77593 | 2.6611   | 2.90768  |
| H | -1.71724 | 2.61391  | 4.42293  |
| H | -0.36173 | 0.63473  | 5.22501  |
| C | -2.46211 | -2.04145 | 0.83368  |
| N | -2.46229 | -2.824   | -0.02108 |
| B | 0.07828  | 0.0043   | 0.14375  |
| C | -1.24239 | 0.44058  | -0.70202 |
| C | -1.89302 | 1.63378  | -0.37067 |
| C | -3.01728 | 2.11632  | -1.02637 |
| C | -3.54596 | 1.3844   | -2.08578 |
| C | -2.93662 | 0.19368  | -2.45997 |
| C | -1.80359 | -0.24887 | -1.77863 |
| C | 1.27156  | 1.1245   | 0.12619  |
| C | 1.4336   | 2.09318  | -0.86524 |
| C | 2.49363  | 2.99713  | -0.88758 |
| C | 3.45968  | 2.94807  | 0.10965  |
| C | 3.35175  | 1.99049  | 1.11232  |
| C | 2.28136  | 1.10219  | 1.09177  |
| C | 0.74942  | -1.4371  | -0.19554 |
| C | 0.85892  | -2.52998 | 0.66046  |
| C | 1.5447   | -3.69709 | 0.32861  |

|   |          |          |          |
|---|----------|----------|----------|
| C | 2.16322  | -3.79951 | -0.91026 |
| C | 2.08405  | -2.73249 | -1.80089 |
| C | 1.39434  | -1.58782 | -1.42479 |
| F | -1.4156  | 2.39483  | 0.64277  |
| F | -3.58914 | 3.27346  | -0.65805 |
| F | -4.63298 | 1.82194  | -2.7319  |
| F | -3.44449 | -0.52575 | -3.47227 |
| F | -1.28842 | -1.41528 | -2.20702 |
| F | 0.55565  | 2.19843  | -1.88457 |
| F | 2.59003  | 3.91059  | -1.86718 |
| F | 4.48475  | 3.81047  | 0.10372  |
| F | 4.28373  | 1.92314  | 2.07698  |
| F | 2.26135  | 0.17225  | 2.07688  |
| F | 1.34422  | -0.57807 | -2.32228 |
| F | 2.67329  | -2.81932 | -3.00389 |
| F | 2.82383  | -4.91492 | -1.24826 |
| F | 1.60968  | -4.71927 | 1.19702  |
| F | 0.27404  | -2.52662 | 1.88415  |

49

TS1J-N<sub>2</sub> SCF Done: E(RB3LYP) = -2716.41064204

|   |          |         |          |
|---|----------|---------|----------|
| C | -6.32031 | 3.14062 | 0.       |
| O | -6.45806 | 3.28436 | 1.29498  |
| O | -5.26751 | 3.54154 | -0.56268 |
| C | -7.45437 | 2.66521 | -0.75195 |
| N | -8.78074 | 2.36814 | 0.6758   |
| N | -9.80151 | 2.52533 | 1.07786  |
| C | -5.38716 | 3.98264 | 2.03624  |
| H | -4.43136 | 3.71793 | 1.58537  |
| C | -5.6375  | 5.47844 | 2.03121  |
| H | -4.85741 | 5.97067 | 2.62031  |
| H | -5.60304 | 5.87982 | 1.01581  |
| H | -6.60623 | 5.71855 | 2.47737  |
| H | -5.46345 | 3.54868 | 3.03355  |
| C | -7.54276 | 1.4632  | -1.43622 |
| N | -7.703   | 0.47967 | -2.05496 |
| B | -4.83998 | 3.50163 | -2.09432 |
| C | -6.20495 | 3.89994 | -2.90845 |
| C | -6.8522  | 5.11297 | -2.60872 |
| C | -7.95874 | 5.59398 | -3.29032 |
| C | -8.4764  | 4.84718 | -4.34859 |
| C | -7.88443 | 3.63491 | -4.68908 |

|   |          |          |          |
|---|----------|----------|----------|
| C | -6.77246 | 3.18857  | -3.97764 |
| C | -3.6617  | 4.63648  | -2.14918 |
| C | -3.52597 | 5.59895  | -3.15166 |
| C | -2.48757 | 6.5284   | -3.18949 |
| C | -1.51672 | 6.51419  | -2.19402 |
| C | -1.59768 | 5.565    | -1.17976 |
| C | -2.64828 | 4.65218  | -1.18536 |
| C | -4.18356 | 2.04094  | -2.41183 |
| C | -4.1102  | 0.94452  | -1.5538  |
| C | -3.44356 | -0.23904 | -1.86804 |
| C | -2.80586 | -0.3594  | -3.09665 |
| C | -2.85294 | 0.70457  | -3.99442 |
| C | -3.52856 | 1.86435  | -3.63494 |
| F | -6.39307 | 5.87561  | -1.59344 |
| F | -8.53158 | 6.75434  | -2.94891 |
| F | -9.54238 | 5.28581  | -5.01651 |
| F | -8.38848 | 2.90872  | -5.6912  |
| F | -6.28767 | 1.99474  | -4.34435 |
| F | -4.41759 | 5.67336  | -4.15995 |
| F | -2.41831 | 7.4318   | -4.17577 |
| F | -0.51576 | 7.40014  | -2.21147 |

|   |          |          |          |
|---|----------|----------|----------|
| F | -0.66606 | 5.53162  | -0.21616 |
| F | -2.64483 | 3.7389   | -0.1838  |
| F | -3.55568 | 2.86124  | -4.54422 |
| F | -2.25021 | 0.60192  | -5.18545 |
| F | -2.16181 | -1.48577 | -3.41753 |
| F | -3.41479 | -1.25467 | -0.9947  |
| F | -4.71765 | 0.96142  | -0.33782 |

17

**Re3** SCF Done: E(RB3LYP) = -604.50780763

|   |          |         |          |
|---|----------|---------|----------|
| C | -3.89844 | 2.1875  | 0.       |
| O | -4.9098  | 3.09454 | 0.00002  |
| O | -4.05382 | 0.98956 | 0.00008  |
| C | -2.59376 | 2.87709 | -0.00014 |
| N | -2.59376 | 4.19683 | -0.00016 |
| N | -2.59378 | 5.32895 | 0.00014  |
| C | -1.28908 | 2.1875  | -0.00017 |
| O | -1.13369 | 0.98957 | -0.00011 |
| O | -0.27772 | 3.09455 | -0.00015 |
| C | 1.04413  | 2.52817 | -0.00013 |
| H | 1.19814  | 1.91213 | -0.88905 |

|   |          |         |          |
|---|----------|---------|----------|
| H | 1.72481  | 3.37888 | -0.00035 |
| H | 1.19827  | 1.91251 | 0.88904  |
| C | -6.23164 | 2.52816 | 0.00016  |
| H | -6.38587 | 1.91245 | -0.88896 |
| H | -6.38557 | 1.91217 | 0.88913  |
| H | -6.91233 | 3.37887 | 0.00041  |

51

IN1H SCF Done: E(RB3LYP) = -2812.78059785

|   |          |          |          |
|---|----------|----------|----------|
| O | 1.12005  | 0.72987  | -0.45797 |
| B | -0.15071 | -0.02508 | 0.10218  |
| C | -1.10494 | -0.60015 | -1.09193 |
| C | -2.18395 | -1.41181 | -0.73648 |
| C | -1.05179 | -0.2604  | -2.44154 |
| C | -3.1247  | -1.89142 | -1.63834 |
| C | -1.973   | -0.71755 | -3.38344 |
| C | -3.01821 | -1.53851 | -2.98034 |
| C | -1.02877 | 1.14105  | 0.83042  |
| C | -1.69823 | 0.98901  | 2.04481  |
| C | -1.27435 | 2.34692  | 0.16893  |
| C | -2.52063 | 1.97046  | 2.59281  |



|   |          |          |          |
|---|----------|----------|----------|
| C | -2.08383 | 3.3553   | 0.68395  |
| C | -2.71234 | 3.16523  | 1.90966  |
| C | 0.5176   | -1.1423  | 1.08958  |
| C | 0.63757  | -2.50124 | 0.7967   |
| C | 1.15546  | -0.74178 | 2.26659  |
| C | 1.30159  | -3.40768 | 1.62114  |
| C | 1.82311  | -1.61191 | 3.12107  |
| C | 1.89627  | -2.96156 | 2.79435  |
| F | -0.0692  | 0.53978  | -2.92622 |
| F | -1.85933 | -0.36583 | -4.67558 |
| F | -3.91453 | -1.98555 | -3.87175 |
| F | -4.13038 | -2.68291 | -1.23081 |
| F | -2.34162 | -1.77104 | 0.55794  |
| F | -0.74114 | 2.5693   | -1.05138 |
| F | -2.27733 | 4.49794  | 0.00324  |
| F | -3.50184 | 4.11997  | 2.42263  |
| F | -3.13161 | 1.77028  | 3.77323  |
| F | -1.57918 | -0.14707 | 2.76467  |
| F | 0.12795  | -3.0188  | -0.34148 |
| F | 1.3868   | -4.70513 | 1.28054  |
| F | 2.54021  | -3.81933 | 3.59752  |

|   |         |          |          |
|---|---------|----------|----------|
| F | 2.40135 | -1.1629  | 4.24769  |
| F | 1.14688 | 0.55905  | 2.63148  |
| C | 1.99049 | 0.21173  | -1.20924 |
| O | 1.80593 | -1.0272  | -1.58802 |
| C | 2.32357 | -1.62051 | -2.80916 |
| H | 2.35625 | -0.87964 | -3.60614 |
| H | 3.30037 | -2.06281 | -2.62522 |
| H | 1.60708 | -2.40016 | -3.04813 |
| C | 3.15836 | 0.99139  | -1.51967 |
| C | 3.3152  | 2.437    | -1.16727 |
| O | 2.39015 | 3.17946  | -0.92957 |
| O | 4.61891 | 2.766    | -1.15719 |
| C | 4.91446 | 4.15038  | -0.86335 |
| H | 6.00046 | 4.20333  | -0.79579 |
| H | 4.54759 | 4.78993  | -1.66887 |
| H | 4.45332 | 4.44255  | 0.08072  |
| N | 4.24215 | 0.37374  | -1.97029 |
| N | 5.19106 | -0.08865 | -2.36161 |

51

TS1H-N<sub>2</sub> SCF Done: E(RB3LYP) = -2812.71644626

|   |           |          |          |
|---|-----------|----------|----------|
| O | -6.38281  | 3.875    | 0.       |
| B | -7.68348  | 3.09834  | 0.58699  |
| C | -8.62434  | 2.5255   | -0.62272 |
| C | -9.7398   | 1.75982  | -0.26556 |
| C | -8.54568  | 2.82196  | -1.98195 |
| C | -10.68757 | 1.29479  | -1.16993 |
| C | -9.46783  | 2.37552  | -2.92843 |
| C | -10.55114 | 1.60787  | -2.52017 |
| C | -8.51831  | 4.29655  | 1.31068  |
| C | -9.15716  | 4.18857  | 2.54812  |
| C | -8.73406  | 5.50562  | 0.64083  |
| C | -9.9202   | 5.21215  | 3.10721  |
| C | -9.48281  | 6.55514  | 1.16603  |
| C | -10.08122 | 6.40631  | 2.41312  |
| C | -6.98705  | 1.9908   | 1.56426  |
| C | -6.90046  | 0.62323  | 1.28651  |
| C | -6.32953  | 2.38559  | 2.73603  |
| C | -6.26744  | -0.29476 | 2.12293  |
| C | -5.68485  | 1.50431  | 3.59862  |
| C | -5.65643  | 0.14778  | 3.29036  |
| F | -7.52456  | 3.57033  | -2.48101 |

|   |           |          |          |
|---|-----------|----------|----------|
| F | -9.31528  | 2.6874   | -4.22455 |
| F | -11.44904 | 1.17319  | -3.41147 |
| F | -11.72655 | 0.55778  | -0.75686 |
| F | -9.92871  | 1.43871  | 1.03033  |
| F | -8.21958  | 5.69514  | -0.59228 |
| F | -9.64424  | 7.69483  | 0.47765  |
| F | -10.80982 | 7.39994  | 2.9357   |
| F | -10.50061 | 5.05377  | 4.30552  |
| F | -9.06121  | 3.05994  | 3.27717  |
| F | -7.41567  | 0.10932  | 0.15071  |
| F | -6.22299  | -1.5952  | 1.79726  |
| F | -5.03545  | -0.71714 | 4.09935  |
| F | -5.08104  | 1.95008  | 4.7097   |
| F | -6.28755  | 3.68767  | 3.08213  |
| C | -5.51995  | 3.46089  | -0.81096 |
| O | -5.4888   | 2.18204  | -1.12392 |
| C | -5.08044  | 1.69837  | -2.42609 |
| H | -5.09474  | 2.5094   | -3.15401 |
| H | -4.08828  | 1.25217  | -2.34952 |
| H | -5.8112   | 0.9322   | -2.68303 |
| C | -4.6576   | 4.42652  | -1.43256 |

|   |          |         |          |
|---|----------|---------|----------|
| C | -4.21756 | 5.64889 | -0.81874 |
| O | -5.15081 | 6.4247  | -0.67791 |
| O | -2.93686 | 5.86712 | -0.55511 |
| C | -2.63163 | 7.19223 | -0.04529 |
| H | -1.54784 | 7.21693 | 0.04812  |
| H | -2.98093 | 7.9528  | -0.74549 |
| H | -3.10755 | 7.33686 | 0.92596  |
| N | -2.78282 | 3.36019 | -1.55171 |
| N | -1.76214 | 3.16718 | -1.93049 |
